# Development of a Cell Surface Display System in *Chlamydomonas reinhardtii*

João Vitor Dutra Molino<sup>1</sup>, Roberta Carpine<sup>1</sup>, Karl Gademann<sup>1</sup>, Stephen Mayfield<sup>2,⊥</sup> and Simon Sieber<sup>1,⊥</sup>.

## Affiliation:

1-University of Zurich, Winterthurerstrasse 190, 8057 Zurich, Switzerland

2-California Center for Algae Biotechnology, Division of Biological Sciences, University of California, San Diego, California, United States of America

⊥Corresponding authors

## Abstract

Cell-surface display systems are biotechnological techniques used to expose heterologous proteins on the cell surface. Their application depends directly on the cell system used for the development, as well as anchoring point surface displayed protein. To meet most application demands an inexpensive, safe, and scalable production platform, that reduces the economic barriers for large scale use. Towards this goal, we screened three possible cell surface anchoring points in the green algae *Chlamydomonas* by fusing mVenus to prospective anchors moieties. The vectors harboring mVenus:anchor were screened for mVenus fluorescence and tested for cellular localization by confocal laser scanning microscopy. This strategy allowed the identification of two functional anchors, one for the cytoplasmic membrane using the MAW8 GPI-anchor signal, and one for the cell wall using the GP1 protein. We also exploited GP1 chemical and biological traits to release the fused proteins efficiently during cell wall shedding. Our work provides the base for surface engineering of *C. reinhardtii* supporting both cell biology studies and biotechnology applications.

**Keywords:** *Chlamydomonas reinhardtii*, surface display system, algae, cell wall, cytoplasmic membrane, perchlorate treatment, mating

## Introduction

Surface display technologies have been developed for several organisms including bacteria (Freudl et al., 1986), bacterial spores (Kim & Schumann, 2009; Xu et al., 2011), cyanobacteria (Fedeson & Ducat, 2016; Ferri et al., 2015) and fungi (Andreu & Olmo, 2018; Boder & Wittrup, 1997). These methodologies proved valuable in diverse research fields, such as the development of new vaccines (Kumar & Kumar, 2019), the rapid discovery of active peptides and antibodies (Boder & Wittrup, 1997), bioremediation (Wu et al., 2008), the development of biosensors (Park, 2020), whole cell biocatalyst (Yin et al., 2018), and drug delivery (Singh et al., 2019).

Despite the host organisms being diverse and requiring different expression strategies, cell surface display systems have generally two main features (Smith et al., 2015): i) a signal peptide targeting the protein of interest toward the secretory pathway; ii) an endogenous surface protein that acts as an anchor for the targeted protein. The choice of the host depends on different factors including the complexity of the target protein and the future application of the system. Ideally, a surface display system should have a developed molecular toolkit, an available post-translational modification (PTM) machinery, be easy scaled up, and be inexpensive and safe. For some applications, controlled motility capacity could also be beneficial.

Cell surface display applications could benefit from the use of algae, especially *Chlamydomonas reinhardtii* (*C. reinhardtii*) since it has an extensive molecular tool kit available (Sproles et al., 2021), is generally recognized as safe (GRAS Notice, no. 773), is biocompatible (Schenck et al., 2015), and possesses motility (Weibel et al., 2005; Yasa et al., 2018). In fact, surface modification was successfully pursued by chemical approaches (Kerschgens & Gademann, 2018; Nagai et al., 2019; Qiao et al., 2020; Santomauro et al., 2018; Shchelik et al., 2020; Szponarski et al., 2018; Weibel et al., 2005; Yasa et al., 2018). In contrast, the recombinant approach, albeit pursued (Siripornadulsil et al., 2007), would benefit from an efficient and well characterized system.

In this study, we investigated *C. reinhardtii* as an algae surface display platform to strengthen its biotechnological applications, as a green and efficient production system. *C. reinhardtii* has been extensively studied (Rasala & Mayfield, 2015), a molecular genetic toolkit has already been developed, and is a widely used model organism (Harris, 2001; Salomé & Merchant, 2019). Transformation protocols and vectors are available for the nuclear, chloroplast, and mitochondrial genomes (Maul et al., 2002; Merchant et al., 2007; Popescu & Lee, 2007). Furthermore, *C. reinhardtii* possesses two possible anchoring strategies, the cytoplasmic membrane and the cell wall (Figure 1). Finally, we aimed to (1) evaluate each of the systems mentioned above for their ease of implementation and performance, (2)

investigate the effect on the motility and speed of the modified organism, and (3) develop release strategies.

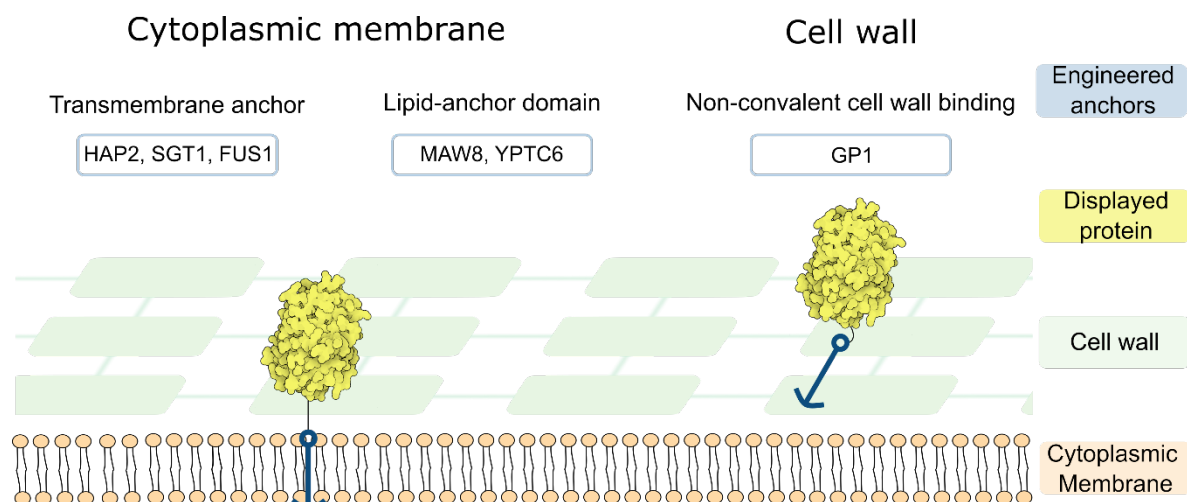

**Figure 1:** Graphical scheme of the possible anchoring strategies of the cell surface proteins in *C. reinhardtii*. Protein images were generated with Illustrate (Goodsell et al., 2019), using data from PDB ID: 1F0B, (Wachter et al., 2000), hosted in PDB (<http://www.rcsb.org>), (Berman et al., 2000). Examples of proteins according to each strategy: i) Transmembrane anchor as in HAP2, SGT1, and FUS1 (W S Adair & Apt, 1990; Joo et al., 2017; Y. Liu et al., 2015; Saito et al., 2014); ii) Lipid anchor domain as in MAW8 (Joo et al., 2017) and YPTC6 (Dietmaier et al., 1995); iii) covalent cell wall binding as in a 14-3-3 like protein (Voigt, 2003); iv) non-covalent cell wall binding as in GP1 (Ursula W Goodenough & Heuser, 1988)

## Results

### Screening of suitable anchors to *Chlamydomonas reinhardtii*

To identify prospective anchors for cell display technology in *C. reinhardtii*, we applied a screening strategy protocol using 96 well plates, followed by a validation step by subcellular localization by confocal laser scanning microscope (Supp. Figure S.1).

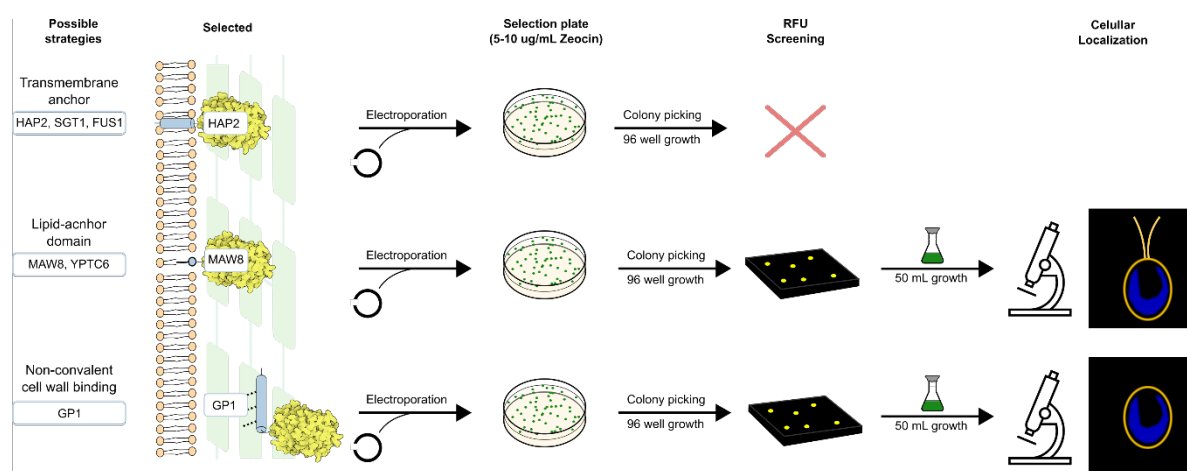

**Supp. Figure S.1:** Schematic representation of the vector testing workflow for the identification of functional anchor motif. Protein images were generated with Illustrate (Goodsell et al., 2019), using data from PDB ID: 1F0B, (Wachter et al., 2000), hosted in PDB (<http://www.rcsb.org>), (Berman et al., 2000).

The 96 well plate fluorescent screening methodology allowed us to efficiently evaluate the construct and identify top producers (Figure 2) among 96 candidates for each construct.

We used the pJPZ12 construct as a positive control for transformations, a vector based on pAH04 (Molino et al., 2018). The construct pJPZ12 generated a large percentage of positive colonies (92.7%), achieving relative fluorescence units (RFU) 4.56-fold superior to the wild type, thus confirming the efficiency of the transformation protocol.

The first anchoring strategy used a truncated version of the gamete fusion protein Hapless 2 (HAP2) (Yanjie Liu et al., 2008; Valansi et al., 2017), also known as GSC1 (Mori et al., 2006). The transmembrane domain of HAP2 was inserted into the protein secretion vector pJPZ11 to form pJPZ11\_HAP2. The screening experiment with pJPZ11\_HAP2 did not resulted in any positive candidate, the outcome was confirmed by 50 mL cultures of the top candidate (Supp. Figure S.2). The maximum RFU obtained during the screening in the 96 well plates for pJPZ11\_HAP2 (3181) was similar to the RFU observed for the wild-type strain (3068).

The second approach focused on lipid-anchored protein using the recently identified MAW8 (Joo et al., 2017), which possessed a putative GPI anchored signal. A truncated version of MAW8, containing the GPI anchored signal, was integrated into our vector to form pJPZ11\_MAW8. The transformation resulted in 4 positive candidates (4.2% of the total tested), with RFU outputs of 2.39-fold higher than the values observed for those of the wild type cells. The top pJPZ11\_MAW8 producers grown in 50 mL cultures yielded high mVenus signal (11254) compared to the wild type cc1690 value of 3390 RFU (Supp. Figure S.2).

The last strategy focused on the hydroxyproline-rich GP1 protein hypothesized to be attached to the cell wall by non-covalent interaction (Goodenough et al., 1986). The vector pJPZ11\_GP1 aimed to anchor mVenus to the chaotropic soluble portion of the cell. The screening resulted in 54 positive candidates (56.3% of the total tested), with some mutants reaching up to 7.45-fold higher RFU value than the wild type. The average RFU values of pJPZ11\_GP1 positive candidates (11856) also outperformed the one observed for the positive control transformed with pJPZ12 (6007). The confirmatory 50 ml culture experiment with the top mutant uphold the high expression trend. (Supp. Figure S.2). The initial screening results are summarized in Table1.

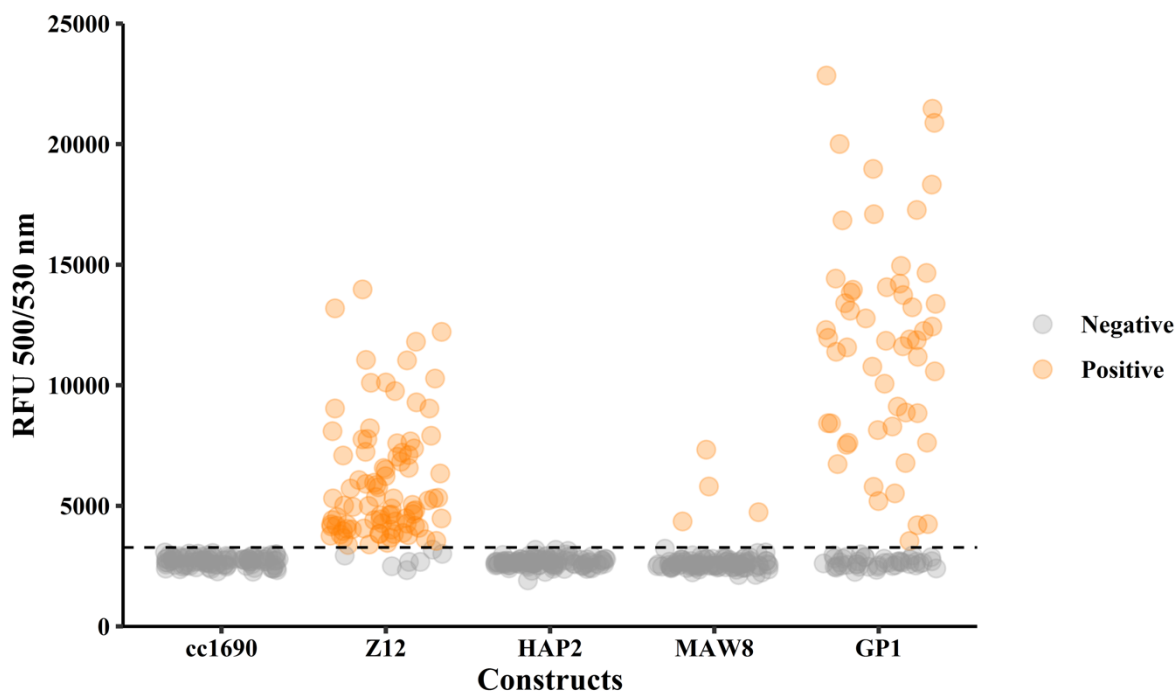

**Figure 2:** RFU values of mVenus fluorescence intensity obtained for each strain during the initial screening. A total of 96 colonies were grown in 96-well plates for 5 days for each test and the parental wild type cc1690 was used as the negative control. Positive results (orange) were attributed to results superior to the average fluorescence reading of cc1690 plus 3 standard deviations (cutoff = CC1690avg + 3\*SD) and negative results are indicated in gray. Z12: positive control for mVenus expression, colonies from transformation with the pJPZ12 construct for the expression of mVenus in the cytosol; HAP2: colonies from transformation with the construct pJPZ11\_HAP2 possessing a truncated version of HAP2 containing the transmembrane domain; MAW8: colonies from transformation with the construct pJPZ11\_MAW8 with a truncated version of MAW8 that contained the GPI anchor signal; GP1: colonies from transformation with the construct pJPZ11\_GP1 with the mature hydroxyproline-rich GP1 protein. RFU: relative fluorescence units, recorded using a 500 nm excitation wavelength, a 530 nm emission wavelength, and a gain of 120. All source files are available in the Figure 2 — source data 1 (10.5281/zenodo.4739662).

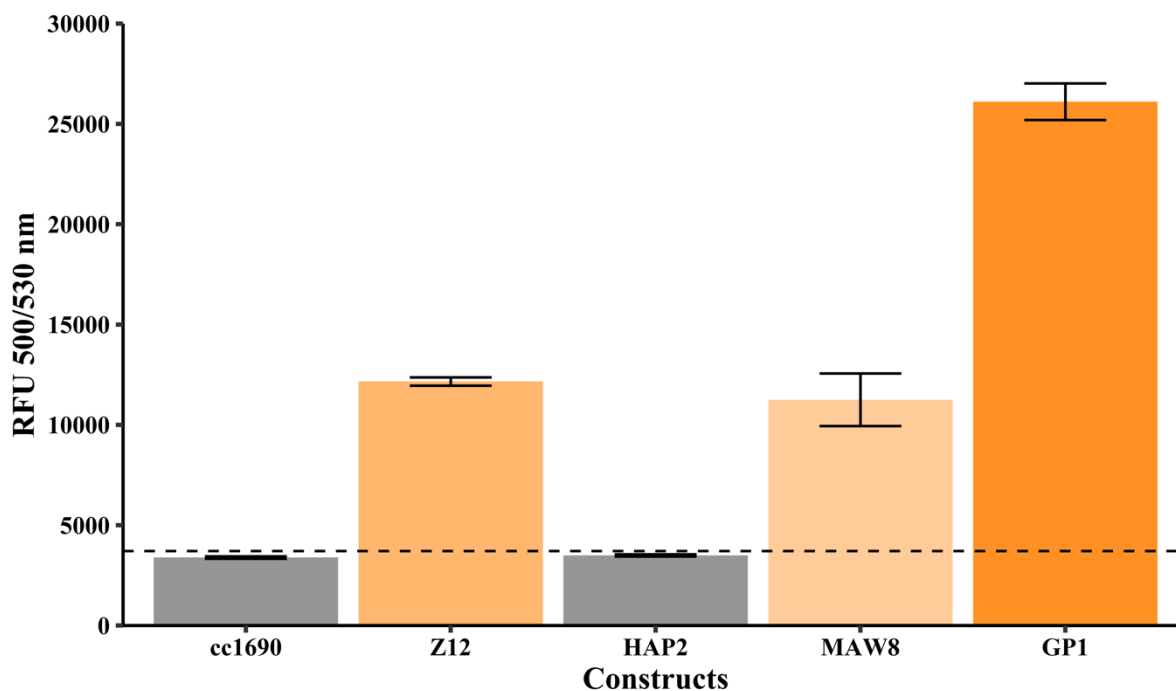

**Supp. Figure S.2:** The RFU values of mVenus fluorescence intensity were recorded for each top producer strains and the wild type cc1690. The selected strains were grown in agitated 250 mL flasks containing 50 mL of TAP media in biological triplicates, for 5 days, and the parental wild type cc1690 was used as the negative control. Positive results (orange) were attributed to

average results superior to the average fluorescence reading for cc1690 plus 3 standard deviations (cutoff = CC1690avg + 3\*SD), negative results are indicated in gray, and the error bars represent sample standard deviation. Z12: positive control for mVenus expression, colonies from transformation with the pJPZ12 construct for the expression of mVenus in the cytosol; HAP2: colonies from transformation with the construct pJPZ11\_HAP2 possessing a truncated version of HAP2 containing the transmembrane domain; MAW8: colonies from transformation with the construct pJPZ11\_MAW8 with a truncated version of MAW8 that contained the GPI anchor signal; GP1: colonies from transformation with the construct pJPZ11\_GP1 with the mature hydroxyproline-rich GP1 protein. RFU: relative fluorescence units, recorded using a 500 nm excitation wavelength, a 530 nm emission wavelength, and a gain of 120. All source files are available in the Supplementary Figure 2 - source data 1 (10.5281/zenodo.4739662).

**Table 1:** Summary of the initial screening using mVenus fluorescence in the 96 well plates.

| Variables | cc1690 | Z12   | HAP2 | MAW8 | GP1   |
|-----------|--------|-------|------|------|-------|
| Colonies  | 0      | 3313  | 1398 | 1321 | 2351  |
| Max       | 3068   | 13979 | 3181 | 7331 | 22846 |
| n         | 0      | 89    | 0    | 4    | 54    |
| %         | 0.00   | 92.71 | 0.00 | 4.17 | 56.25 |
| Avg       | NA     | 6007  | NA   | 5557 | 11856 |
| SD        | NA     | 2444  | NA   | 1332 | 4530  |

Note: Max: RFU measurement of the top producer; n: number of positive results; % percentage of positive results; Avg: average RFU value for the positive results of each strain; SD: standard deviation value for the positive results of each strain. Results were recorded after the growth of 96 individual colonies in 96 well plates for 5 days. The parental wild type CC1690 was used as the negative control. Positive results are attributed to results superior to the average fluorescence reading for CC1690 plus 3 standard deviation (cutoff = CC1690avg + 3\*SD). Z12: positive control for mVenus expression, colonies from transformation with the pJPZ12 construct for expression of mVenus in the cytosol; HAP2: colonies from transformation with the construct pJPZ11\_HAP2 possessing a truncated version of HAP2 containing the transmembrane domain; MAW8: colonies from transformation with the construct pJPZ11\_MAW8 with a truncated version of MAW8 that contained the GPI anchor signal; GP1: colonies from transformation with the construct pJPZ11\_GP1 with the mature hydroxyproline-rich GP1 protein. RFU: relative fluorescence units, recorded using a 500 nm excitation wavelength, a 530 nm emission wavelength, and a gain of 120. All source files are available in the Supplementary Table 1 - source data 1 (10.5281/zenodo.4739662).

## Fusion proteins localization

The localization of the expressed fusion proteins can be determined by detecting the fluorescent protein localization with confocal laser scanning microscopy. We prepared agarose pads containing live immobilized cells in glass slides, which allowed the imaging of mVenus and chlorophyll for each strain (Figure 3, Supp. Figure S.3). The wild type cells cc1690 displayed only chlorophyll fluorescent signals, as expected. The strain containing the pJPZ12 construct expressed mVenus in the cytosol and the space occupied by the chloroplast ("U" shape) can be observed on the mVenus channel. The strain holding the pJPZ11\_MAW8 construct, displayed mVenus fluorescence signal in intracellular vesicles and at the cell membrane. These results would indicate that the truncated version of MAW8 that possesses the GPI anchor signal can be lipidated. The strain bearing the pJPZ11\_GP1 vector displayed a thick fluorescent signal at the expected position of the cell wall. We hypothesized that mVenus was successfully displayed on the cell wall. In agreement with our initial screening, mVenus fluorescent signal was not observed for the strains transformed with the construct pJPZ11\_HAP2 (Supp Figure S.3).



The mutant strains had a similar growth pattern to the wild type cc1690 (Supp Fig 4), and maintained motility capacity (Supp Fig 5; Video 1-2).

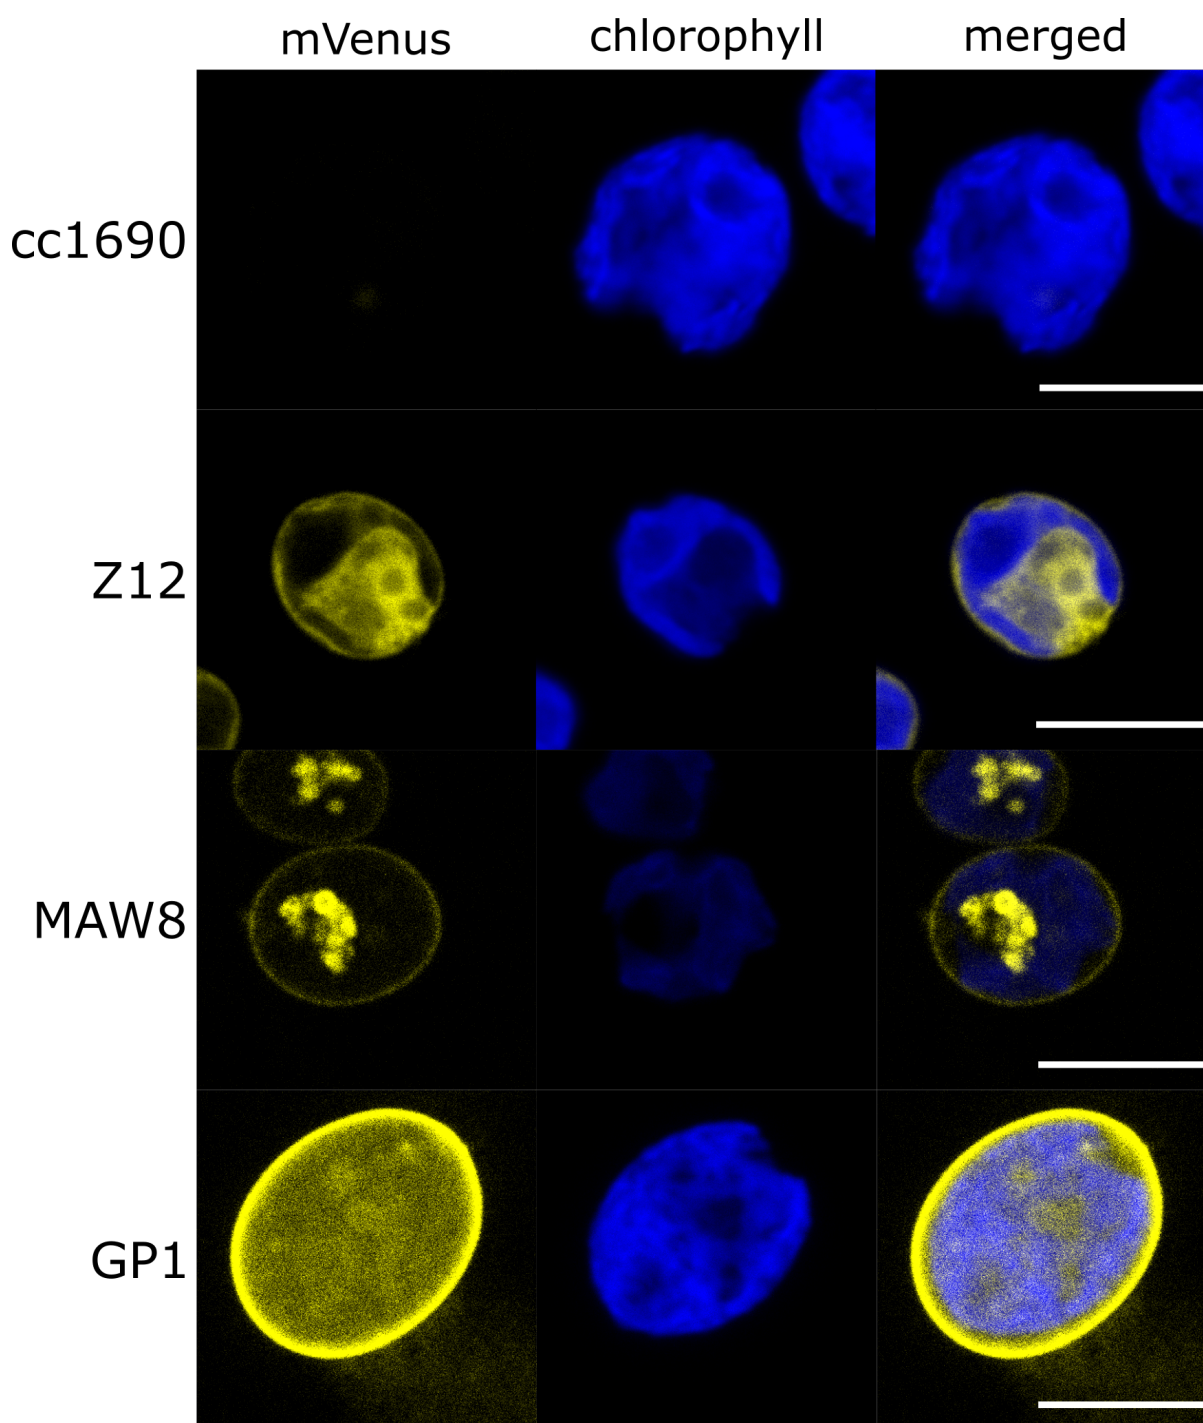

**Figure 3:** Localization of mVenus and chlorophyll fluorescence. Confocal fluorescence microscopy images of the recombinant strains identified during the initial screening and the parental wild-type cc1690. The parental wild type cc1690 was used as the negative control. Z12: positive control for mVenus expression, cell transformed with the pJPZ12 construct for expression of mVenus in the cytosol; MAW8: cell transformed with the construct pJPZ11\_MAW8 with a truncated version of MAW8 that contained the GPI anchor signal; GP1: cell transformed with the construct pJPZ11\_GP1 with the mature hydroxyproline-rich GP1 protein. mVenus channel was set with 515 nm excitation wavelength, detector with wavelength window (525nm - 572nm). Chlorophyll channel was set with 478 nm excitation wavelength, detector with wavelength window (661nm - 706nm). Scale bars represent 10  $\mu$ m. All source files are available in the Figure 3 - source data 1 (10.5281/zenodo.4739662).

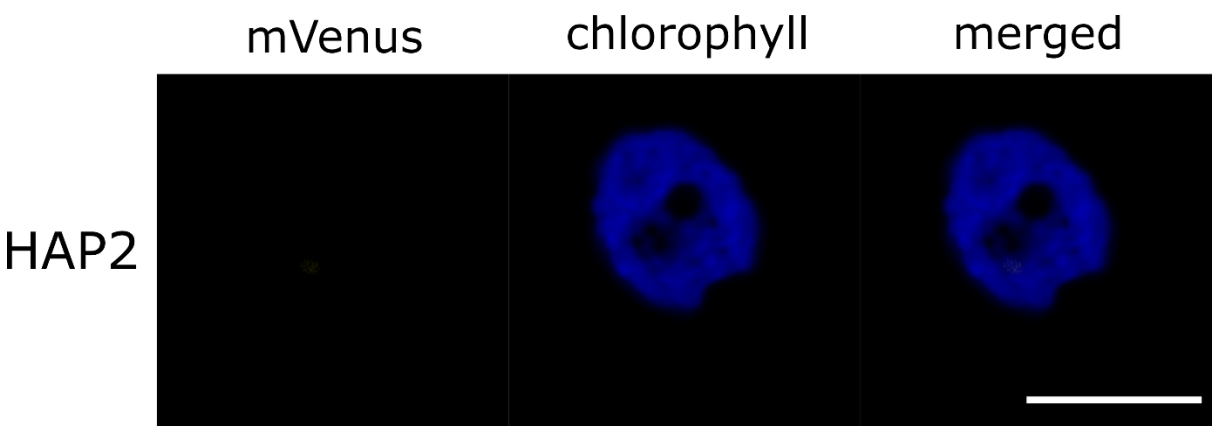

**Supp. Fig S.3:** Confocal fluorescence microscopy images of the recombinant strains identified during the initial screening. HAP2: cell transformed with the construct pJPZ11\_HAP2 possessing a truncated version of HAP2 containing the transmembrane domain . mVenus channel was set with 515 nm excitation wavelength, detector with wavelength window (525nm - 572nm). Chlorophyll channel was set with 478 nm excitation wavelength, detector with wavelength window (661nm - 706nm). Scale bars represent 10  $\mu$ m. All source files are available in the Supplementary Figure 3 - source data 1 (10.5281/zenodo.4739662).

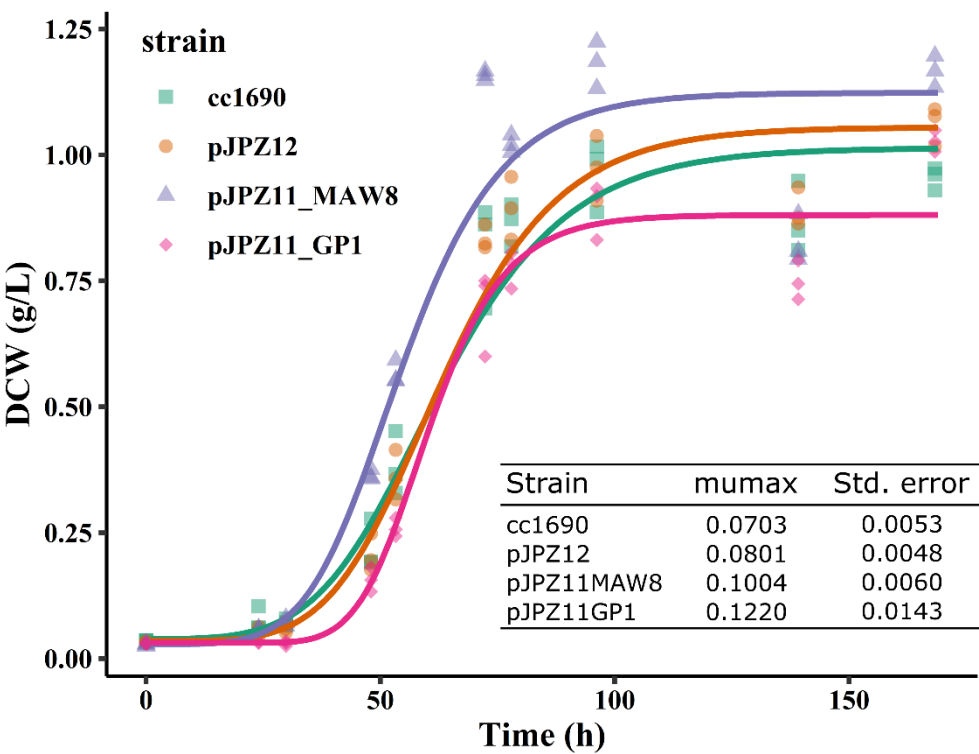

**Supp. Fig S.4:** Growth curve comparison of the wild type cc1690 and the recombinant strains possessing the vector pJPZ12, pJPZ11\_MAW8, and pJPZ11\_GP1. The experiment was performed in biological triplicates. The parental wild type CC1690 was used as the negative control. Z12: positive control for mVenus expression in the cytosol with the pJPZ12 construct; MAW8: cell transformed with construct pJPZ11\_MAW8 containing a truncated version of MAW8 that contained the GPI anchor signal; GP1: cell transformed with construct pJPZ11\_GP1 containing the mature hydroxyproline-rich GP1 protein. DCW: Dry cell weight (g/l). The data were fitted to a Gompertz function, and the generated curves are represented as solid lines. The estimate  $\mu$ max and estimated standard errors are presented in the table. All source files are available in the Supplementary Figure 4 - source data 1 (10.5281/zenodo.4739662).



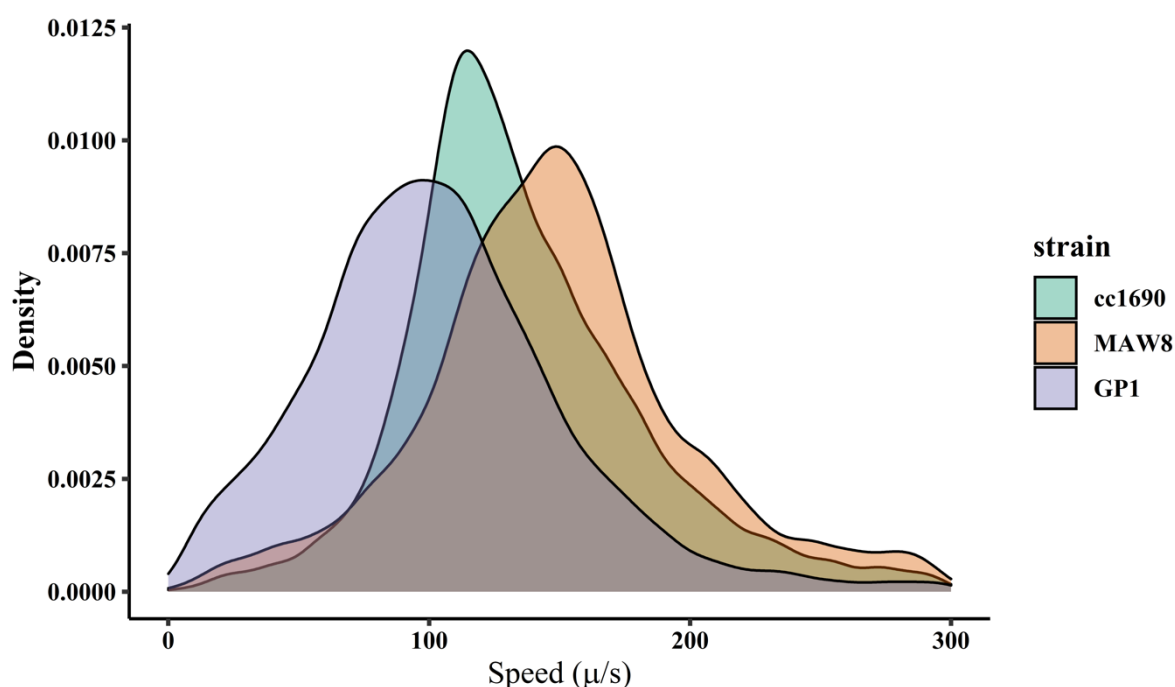

**Supp. Fig S.5:** Density plot of the average speed of cells. cc1690 is the parental wild-type (green); MAW8: cell transformed with construct pJPZ11\_MAW8 containing a truncated version of MAW8 that contained the GPI anchor signal (orange); GP1: cell transformed with construct pJPZ11\_GP1 containing the mature hydroxyproline-rich GP1 protein (purple). The selected strains were grown in agitated 250 mL flasks containing 50 mL of TAP media with three replicates per each of the biological triplicate, for 5 days and their motion was recorded with spinning disk confocal microscopy. The results for each strain was pooled and plotted as density plots. Laser with 488 nm wavelength for excitation, and filters 525nm and 617nm for emission. All source files are available in the Supplementary Figure 5 - source data 1-4 (10.5281/zenodo.4739662).

## Investigation of the cell wall anchor GP1

### Chemical release

To further characterize GP1 as an anchor, we evaluated chemical and biological approaches to trigger the proteins' release, as well as inspect GP1 capacity to anchor two proteins simultaneously. It has been demonstrated that the hydroxyproline-rich GP1 is part of the extracellular cell wall and can be solubilized using chaotropic salts such as NaClO<sub>4</sub> (Goodenough et al., 1986). We applied the chaotropic solution with the pJPZ11\_GP1 to investigate the recovery efficiency of the fusion protein mVenus:GP1. We used the strain pJPZ12 as a negative control for mVenus presence into the cell wall (Figure 4). The perchlorate treatment led to a 2.57 higher mVenus signal intensity in the supernatant of pJPZ11\_GP1 compared to pJPZ12 (Figure 4,A). The fusion protein released from the cell wall was confirmed by confocal laser scanning microscopy by comparison of the treated and untreated pJPZ11\_GP1 cells (Figure 4,B). Based in a reported procedure (Goodenough et al., 1986), the cell wall proteins from the wild type cell cc1690 and pJPZ11\_GP1 were crystallized by removing the perchlorate by diafiltration with ddH<sub>2</sub>O (Supp Fig 6).

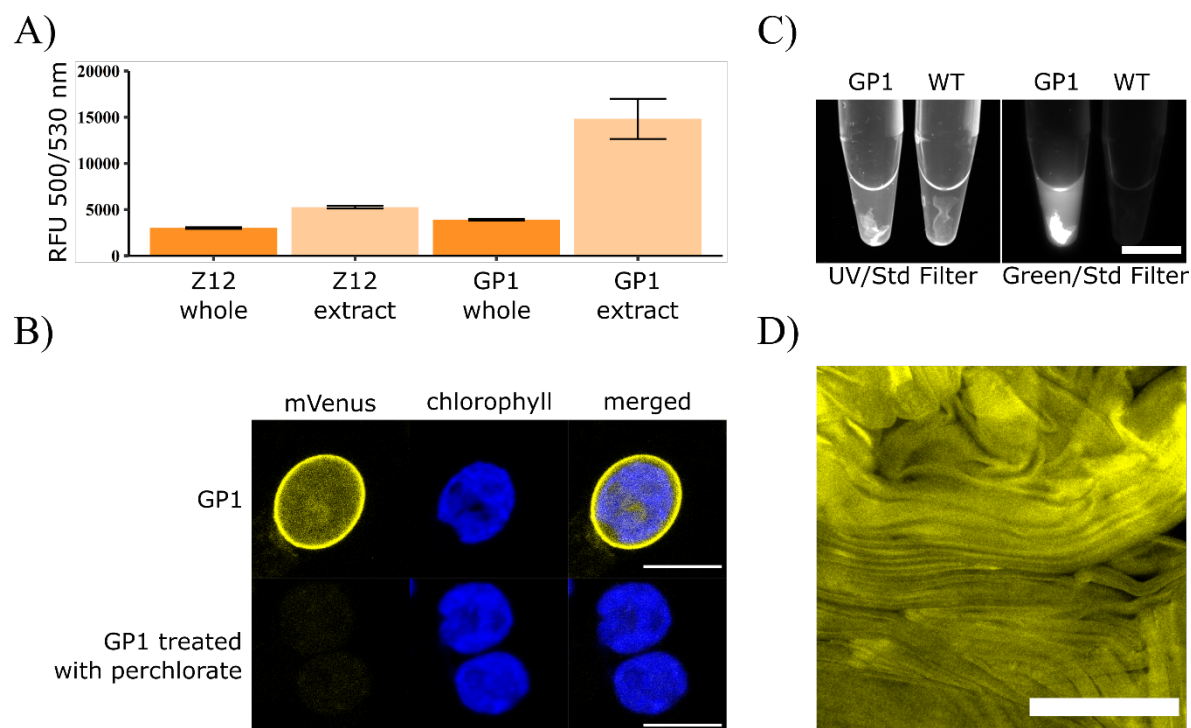

**Figure 4:** Results of the perchlorate treatment experiments and crystallization after diafiltration. A) Average mVenus fluorescence intensity of the whole cell culture and of the extract after perchlorate treatment for biological triplicates. Z12\_whole: 5 days culture of the pJPZ12 strain expressing mVenus in the cytosol; Z12\_extract: supernatant of the strain pJPZ12 extracted with 2M NaClO<sub>4</sub>. GP1\_whole: 5 days culture of the strain expressing mVenus attached to GP1 in the cell wall; GP1\_extract: supernatant of the strain GP1 extracted with 2M NaClO<sub>4</sub>. RFU: relative fluorescence units. The excitation wavelength was 500 nm, and the emission was 530 nm, and the gain was set to 100. B) Confocal fluorescence microscopy images of pJPZ11\_GP1, before and after perchlorate treatment. mVenus channel was set with an excitation wavelength of 515 nm, detector with wavelength window of 525nm - 572nm; Scale bars represent 10  $\mu$ m. C) Recrystallized cell wall proteins of pJPZ11\_GP1. Recrystallization was performed by diafiltration. UV/Std Filter: excitation light with UV (302 nm) and filtered with a standard filter (548-630 nm). Green/Std Filter: epi-illumination with green light (520-545 nm) and filtered with Biorad (BioRad, Hercules, CA) standard filter (548-630 nm) for mVenus fluorescence recording. Scale bar: 10 mm. D) Confocal microscopy images of the recrystallized cell wall of the pJPZ11\_GP1. mVenus channel was set with an excitation wavelength of 515 nm, a wavelength window of 525nm - 572nm; scale bar: 100  $\mu$ m. All source files are available in the Figure 4 - source data 1 (10.5281/zenodo.4739662).

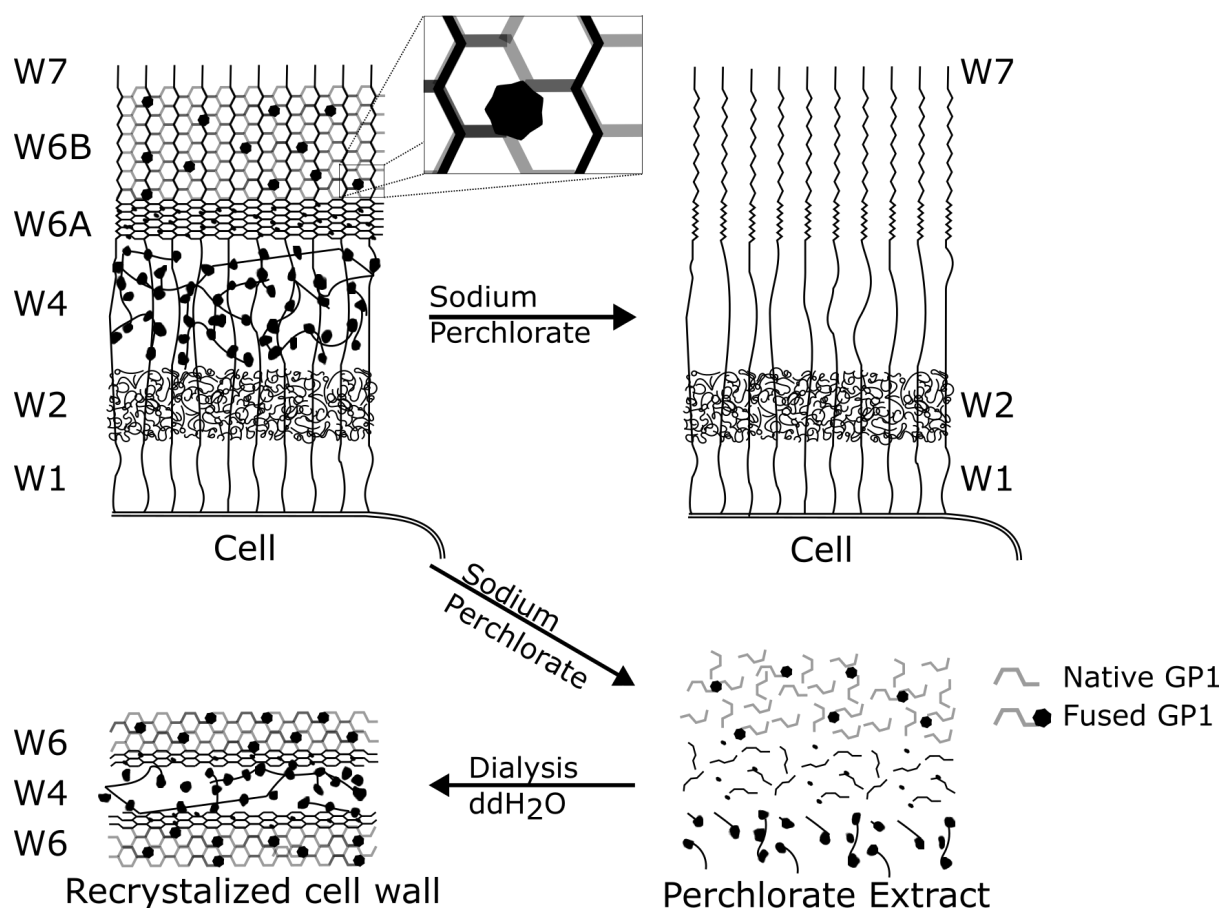

**Supp Figure 6:** Schematic representation of *C. reinhardtii* cell wall layers and the recrystallization protocol using chaotropic salts (sodium perchlorate). The scheme is based on figures published elsewhere (W Steven Adair et al., 1987; U. W. Goodenough et al., 1986; Ursula W Goodenough & Heuser, 1988). W1-7: *C. reinhardtii* cell wall layers.

The crystals were observed using conditions to detect proteins autofluorescence (R. F. Chen, 1967), and mVenus fluorescence (Figure 4,C). Only the crystal of pJPZ11\_GP1 strain presented a fluorescence signal in the mVenus setting (Figure 4, C), and confocal laser scanning microscopy confirmed the presence of mVenus in the cell wall crystals (Figure 4, D).

## Biological release

It was reported that *C. reinhardtii* cell wall proteins are released during sexual reproduction (Matsuda et al., 1985). To examine if the anchored mVenus could be released during mating we tracked mVenus release (Figure 5). We combined equal amounts of cells originated from different cell lines in nitrogen deprived conditions using a modified TAP medium (TAP-N) diluted to 50% ( Sager & Granick, 1953). As expected, the mating of the wild type cc621 mating type minus (mt-) and cc1690 mating type plus (mt+) gave low fluorescent signal values. In contrast, the mating of cc1690 (mt+) and pJPZ11\_GP1 (mt+) (Parental cc1690(mt+)), resulted in an increased fluorescence intensity over time, reaching a maximum of 4827 RFU after 33 hours. The experiment composed of cc621 (mt-) and pJPZ11\_GP1 (mt+), caused a rapid increase in mVenus fluorescence reaching a plateau around 8200 RFU after 20 h. To explore the influence of the media during the mating process, we prepared

experiments composed of cc621 (mt-) and pJPZ11GP1 (mt+) using different dilutions of TAP-N in ddH<sub>2</sub>O to obtained solutions with 100%, 75%, 50%, 25%, 10% and 0% of TAP-N. The conditions using 100% and 75% of TAP-N led to maximum fluorescent levels at approximately 20h, in an intermediary intensity among the conditions tested. The cultures grown with TAP-N 25% and 10% exhibited relatively higher fluorescent intensity with levels superior to 10000 RFU at 20h, with further increase in the TAP-N 25% condition. The most diluted conditions (0%) led to a low mVenus release levels, about 5100 RFU. The fusion protein integrity was investigated by a western blot analysis of the supernatant of the mating experiment in TAP-N 50% at 20h using anti-GFP. The observed band presented a relative mass similar to the unfused mVenus obtained with the secreting strain pJPZ11, a shift in mass in comparison mVenus:GP1 fused protein obtained after perchlorate treatment (Supp. Figure S.7). These results would indicate that mVenus is released from its GP1 anchor during the mating process.

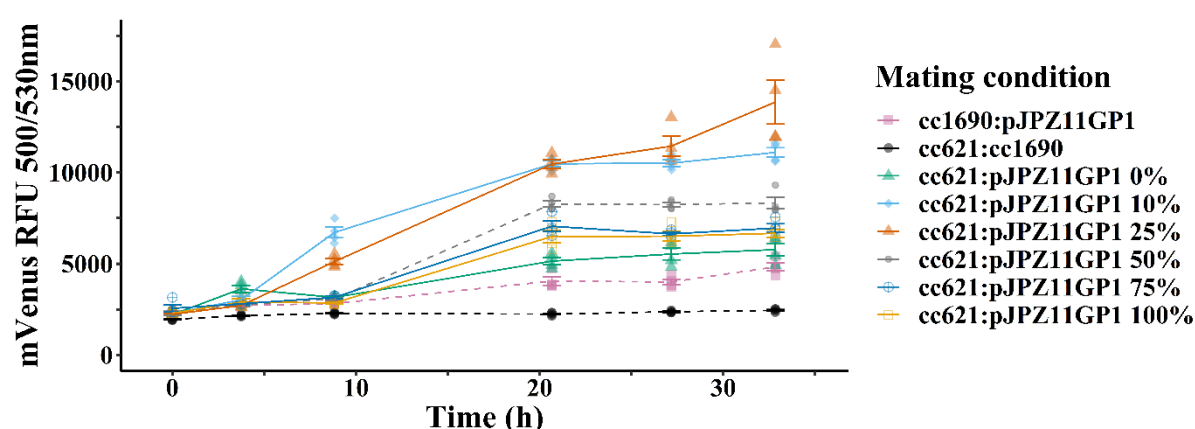

**Figure 5:** Biological release triggered by *C. reinhardtii* mating. All conditions were tested with four biological replicates. Mating experiments in TAP-N medium diluted at 50% with ddH<sub>2</sub>O are marked with dash line (- - -). Filled black circle: negative control with wild type strains cc621 (mt-) and cc1690 (mt+). Filled purple square: negative mating experiment with cc1690 (mt+) and pJPZ11\_GP1 (mt+). Filled gray circle: mating experiment with cc621 (mt-) and pJPZ11\_GP1 (mt+). Influence of media composition on mVenus release for the mating pair cc621 (mt-) and pJPZ11\_GP1 (mt+) are marked with solid line. Empty yellow square: 100% TAP-N. Empty blue square: 75% TAP-N in ddH<sub>2</sub>O. Empty orange square: 25% TAP-N in ddH<sub>2</sub>O. Filled light blue diamond: 10% TAP-N in ddH<sub>2</sub>O. Filled green triangle: 0% TAP-N in ddH<sub>2</sub>O (100% ddH<sub>2</sub>O). All source files are available in the Figure 5 - source data 1 (10.5281/zenodo.4739662).

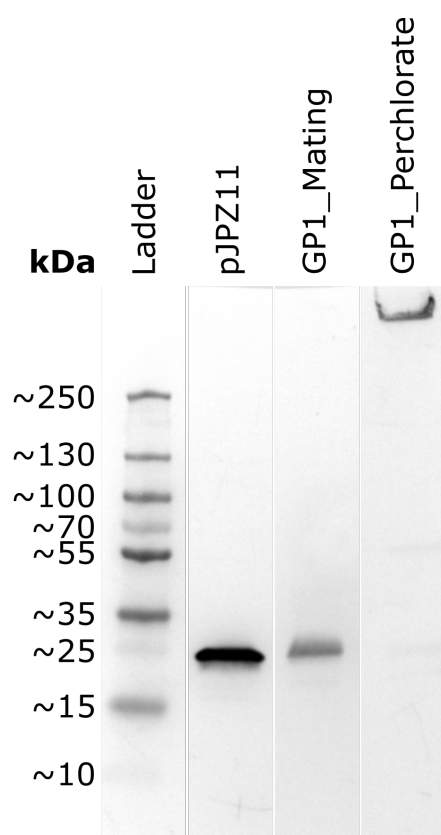

**Supp. Figure S.7:** Release of mVenus from the GP1 anchor under mating condition. Immunoblot of different samples containing mVenus in fused and unfused forms. pJPZ11: sample from unfused secreted mVenus, GP1\_Mating: sample of an initially fused mVenus released during mating, GP1\_Perchlorate: sample of fused mVenus to GP1 anchor obtained by perchlorate treatment. All source files are available in the Supplementary Figure 7 - source data 1 (10.5281/zenodo.4739662).

## Double anchoring

The structure of GP1 is composed of a central domain that contains a repetitive PPSPX motif forming PPII helices (Ferris et al., 2001). It has been hypothesized that this part of the protein was responsible for the protein's attachment to *C. reinhardtii* cell wall (Ferris et al., 2005). Taking advantage of the free C and N-terminal, we investigated the GP1 ability to anchor two proteins by preparing the construct pJPZ11\_GP1mCherry. The construct is a variation of pJPZ11\_GP1 to which we added mCherry to GP1 C-terminal, aiming to produce the fused protein mVenus:GP1:mCherry. We observed a similar number of positive transformed colonies (47%) compare to the results using pJPZ11\_GP1 (56%) (Figure 6). A linear regression with the fluorescence intensity of mVenus, and mCherry demonstrated the expected correlation of fluorescence signal for the pJPZ11\_GP1mCherry (p-value<0,001) and absence for pJPZ11\_GP1 (p-value = 0.6700). The top producers were analyzed by confocal laser scanning microscope. We identified the fluorescence signals corresponding to mCherry and mVenus at a similar position of mVenus signal in pJPZ11\_GP1 (Figure 6A). The fluorescence spectra of the extracted cell wall proteins displayed a similar pattern as mVenus and mCherry, thus indicating that the fluorescent proteins are attached to GP1 (Supp. Figure S.8).

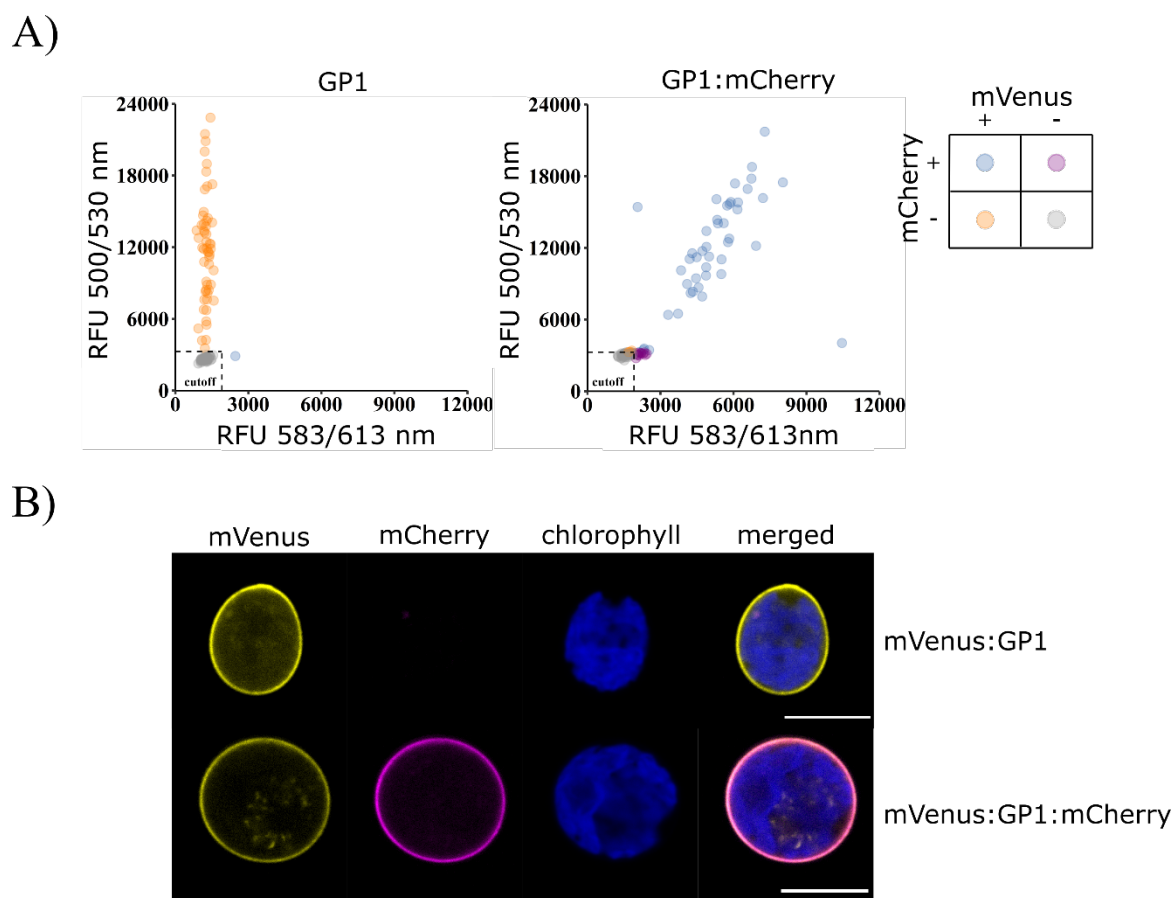

**Figure 6:** GP1 construct with two anchored proteins. A) mVenus and mCherry fluorescence reading for pJPZ11\_GP1 (construct with mVenus:GP1) and pJPZ11\_GP1mCherry (Construct with mVenus:GP1:mCherry). The RFU corresponding to mVenus expression is plotted in the y-axis, and the RFU corresponding to mCherry in the x-axis. 96 colonies were tested for each construct. Positive results are attributed to results superior to the average fluorescence reading of cc1690 plus 3 standard deviations (cutoff = cc1690avg + 3\*SD). Negative results were marked as gray circles. Positive results to mVenus were marked as orange circles; Positive results to mCherry were marked as magenta circles; Positive results to mVenus and mCherry were marked as blue circles. B) Confocal fluorescence microscopy of pJPZ11\_GP1 and pJPZ11\_GP1mCherry strain. mVenus channel was set with excitation wavelength of 515 and, detector with wavelength window of 525nm - 572nm. mCherry channel was set with 588 nm excitation wavelength, detector with wavelength window of 598nm - 641nm. Chlorophyll channel was set with 471 nm excitation wavelength, and wavelength window of 661nm - 706nm. Scale bars represent 10  $\mu$ m All source files are available in the Figure 6 - source data 1 (10.5281/zenodo.4739662).

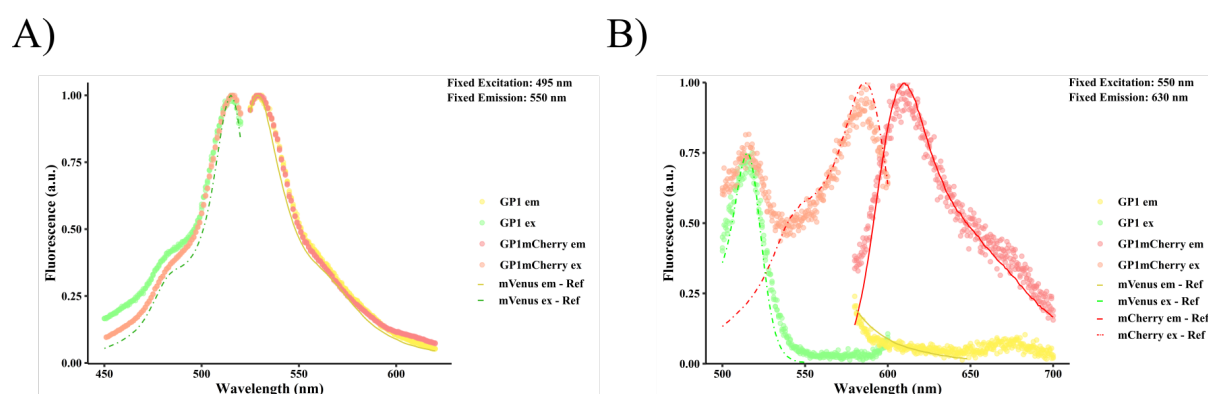

**Supp. Figure S.8:** Fluorescence properties of the fused proteins extracted from the cell wall. Fluorescence scans performed to determine the excitation and emission properties of mVenus and mCherry in three technical replicates. A) Fluorescence profile centered for mVenus photoactive region. Excitation wavelength set at 495 nm and emission wavelength set at 550 nm. B) Fluorescence profile centered for mCherry photoactive region. Emission wavelength set at 550 nm to 630 nm. GP1 em: emission



spectrum of the perchlorate extract of the pJPZ11\_GP1 strain; GP1 ex: excitation spectrum of the perchlorate extract from the pJPZ11\_GP1 strain; GP1mCherry em: emission spectrum of the perchlorate extract from the pJPZ11\_GP1mCherry strain; GP1mCherry ex: excitation spectrum of the perchlorate extract from the pJPZ11\_GP1mCherry strain. mVenus em - Ref: emission spectrum of mVenus (Kremers et al., 2006); mVenus ex - Ref: excitation spectrum of mVenus (Kremers et al., 2006); mCherry em - Ref: emission spectrum of mCherry (Shaner et al., 2004); mCherry ex - Ref: excitation spectrum of mCherry (Shaner et al., 2004);. mVenus and mCherry fluorescence data was obtained from FPbase (Lambert, 2019). All source files are available in the Supplementary Figure 8 - source data 1 (10.5281/zenodo.4739662).

## A tool to study the cell biology of *Chlamydomonas reinhardtii*

To explore the utility of our developed approach's, we captured images of cells in different cell cycle stages using the pJPZ11\_GP1 strain and flagellar discs formed from the pJPZ11\_MAW8 strain. Gametic *C. reinhardtii* cells proliferates by asexual reproduction and, during this process, the cellular division will occur to form new daughter cells (Cross & Umen, 2015). The mother cell wall remains until the end of the mitosis and is degraded by the enzymes of the daughter cells (Kubo et al., 2009). The cell cycle of *C. reinhardtii* was observed at different stages (Figure 7). Flagellar discs are formed when cells are deflagellated (Goodenough, 1993), and their isolation allows a myriad of studies (Goodenough & Heuser, 1999; Huang et al., 1982; Robert A. Bloodgood, 1977; Watanabe & Flavin, 1976). The experiments employing the pJPZ11\_MAW8 strain led to flagellar discs observation formed in preparations with fresh TAP-N (Figure 8 and Video 3).

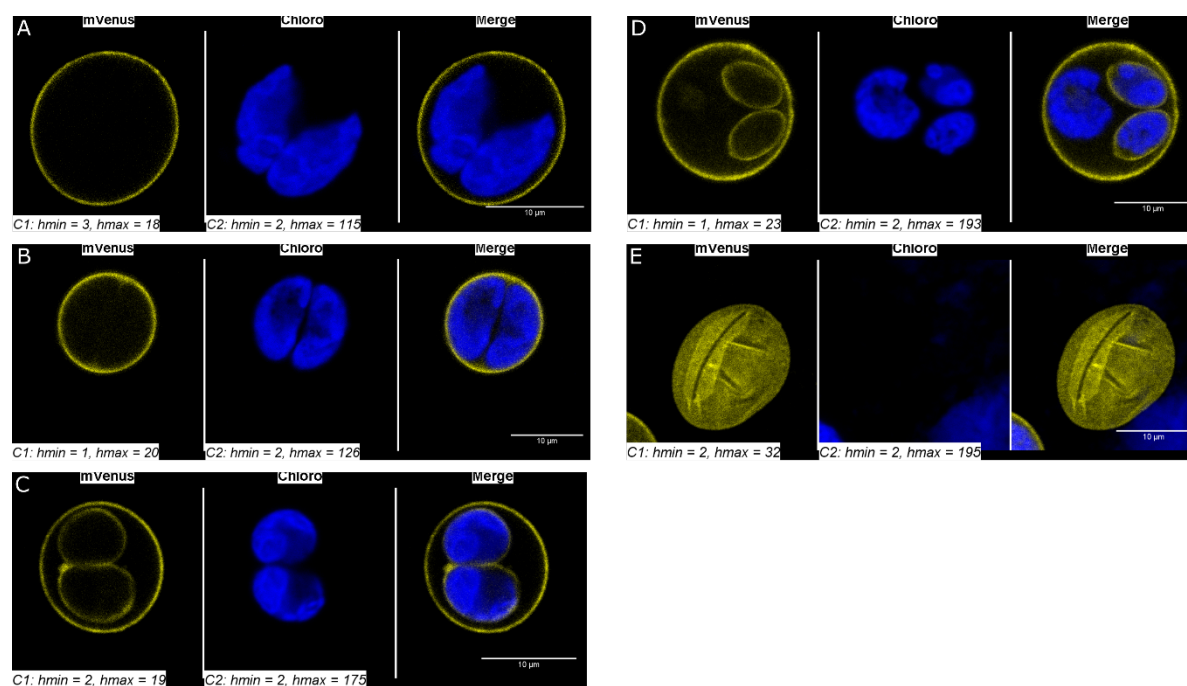

**Figure 7:** Confocal fluorescence microscopy images of pJPZ11\_GP1 strain. A: Initial formation of daughter cells inside the mother cell wall. B: Daughter cells initiating cleavage furrow formation. C: Daughters cells possessing already their cell wall in the mother cell wall. D: Daughter cells with their cell wall and daughter cell in division inside the mother cell wall. E: Empty cell wall. mVenus channel was set with 515 nm excitation wavelength, detector with wavelength window (598nm - 641nm). Chlorophyll was set with 471 nm excitation wavelength, detector with wavelength window (661nm - 706nm). Brightness and contrast were adjusted employing the auto function in ImageJ, and the final adjustments are added to each picture. The process was automatized with an ImageJ macro available at <https://gitlab.com/Molino/green-surfing-code>. Scale bars represent 10 µm. All source files are available in the Figure 7 - source data 1 (10.5281/zenodo.4739662).

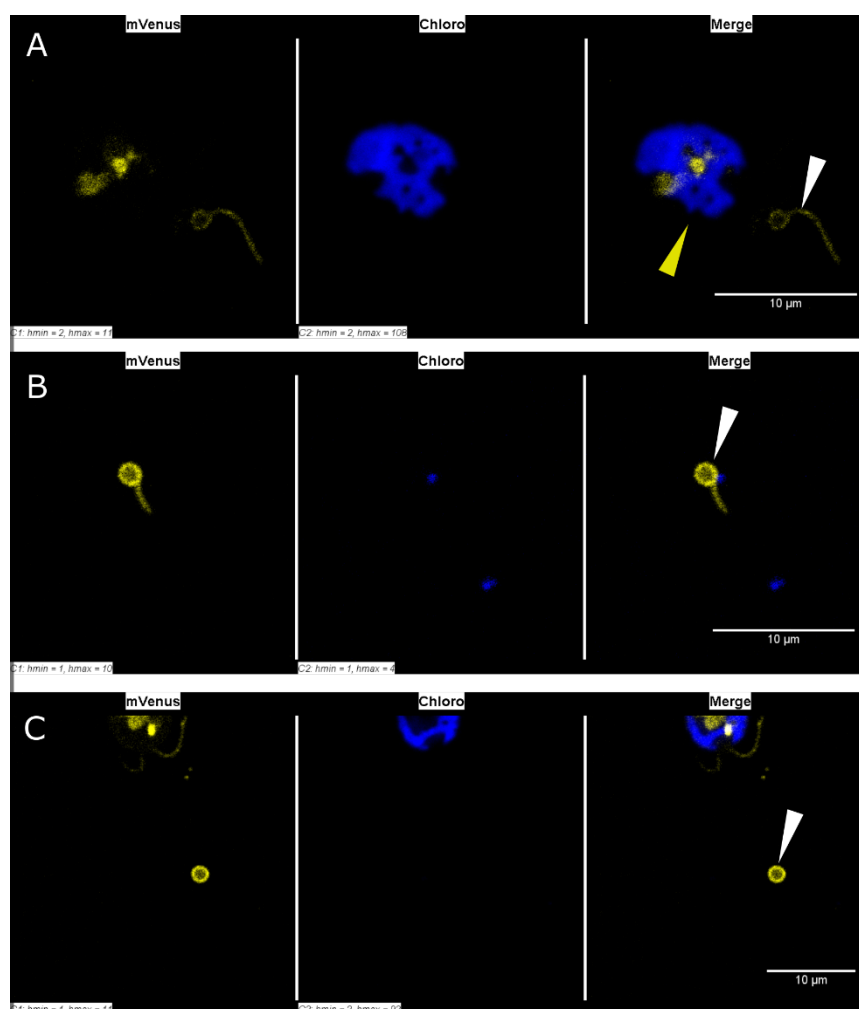

**Figure 8:** Confocal fluorescence microscopy images of pJPZ11\_MAW8 strain flagellar discs. A: Detached flagella with disc on the tip (white arrow) and a deflagellated pJPZ11\_MAW8 (yellow arrow). B: Detached flagella with disc on the tip. C: Flagellar disc. mVenus channel was set with 515 nm excitation light, detector with wavelength window (598nm - 641nm). Chlorophyll was set with 471 nm excitation light, detector with wavelength window (661nm - 706nm). Brightness and contrast were adjusted employing the auto function in ImageJ, and the final adjustments are added to each picture. The process was automatized with an ImageJ code available at <https://gitlab.com/Molino/green-surfing-code>. Scale bars represent 10 µm. All source files are available in the Figure 8 - source data 1 (10.5281/zenodo.4739662).

## Discussion

The green algae *C. reinhardtii* have been extensively investigated, and it is recognized as a photosynthetic model organism in science and commercial use is underway, for instance the company Triton Algae Innovations. In this work, we add essential tools that unlock a set of biotechnological applications bringing unique functionalities to this organism. We developed two algae surface technologies that enables protein anchoring at the cytoplasmic membrane or the cell wall.

Cell-surface technology remains a powerful tool for human health, being used in the development of vaccines (Kumar & Kumar, 2019), nanobodies (McMahon et al., 2018), and has been studied as a delivery system (Riehle & Jacobs-Lorena, 2005). The application potential of this technology is even broader reaching food (Jung et al., 1998) and energy industry (Yuzbasheva et al., 2015), environmental recovery strategies (Chen & Georgiou, 2002), nanorobots research (Leonardo et al., 2010), and as a research tool to unveil cell-cell

interaction mechanisms (Stickney et al., 2016) and cell wall formation. The host diversity range from bacterial systems (Schüürmann et al., 2014), yeast cells (Pepper et al., 2008), and less commonly insect (Grabherr et al., 2001) and mammalian systems (Bruun et al., 2017).

We envisioned *C. reinhardtii* as an ideal candidate for the future development of key applications in cell-surface biotechnology. A system based on *C. reinhardtii* would be inexpensive due to its low-cost growth requirements (Mayfield et al., 2003) and would represent an attractive alternative in bioprocesses in which the cost is a limiting factor. Also, scaling up is another crucial trait that has been successfully demonstrated in pilot scale productions with both natural and recombinant strains (Fields et al., 2020; Gimpel et al., 2015). Furthermore, *C. reinhardtii* is generally recognized as safe (*GRAS Notice, no. 775*, 2018), is resistant to human viral infections (Barone et al., 2020; Bethencourt, 2009), and its oral intake has been correlated with positive effects on the gastrointestinal fitness of mice and human (Fields et al., 2020). Still, *C. reinhardtii* can efficiently express complex proteins as full-length antibodies (Tran et al., 2009) and antibody drug conjugates (Tran et al., 2013) and industrial enzymes (Rasala et al., 2012). Another interesting feature consists of *C. reinhardtii* motility that can be controlled by chemicals or light. This phenomenon, recognized as early as 1916, (Kuwada., 1916) was a source of inspiration to develop *C. reinhardtii* as a micromotor for drug delivery (Santomauro et al., 2018; Shchelik et al., 2020; Weibel et al., 2005; Yasa et al., 2018). Our investigation led to the identification of anchoring systems targeting the cell membrane with the GPI anchor signal of the MAW8 protein and targeting the cell wall with the hydroxyproline-rich GP1. The cell wall represents a compelling location for surface display, and this strategy has already been reported for other organisms (McMahon et al., 2018; Tanaka et al., 2012). The mesh-like structure enclosed in five layers (Goodenough et al., 1986; Goodenough & Heuser, 1985) represents a large surface matrix to host catalytic reactions, such as the ones pursued in whole cell biocatalyst applications. Our results show a higher fluorescence intensity for the construct using GP1 (pJPZ11\_GP1), and this could be explained from the structure difference between the cell wall and cytoplasmic membrane (Figures 2, 3 Supp Figure S.2). Since the initial screening results indicated that GP1 would be a suitable anchoring system for *C. reinhardtii*, and, therefore, we decided to investigate this system further.

The glycoprotein GP1 was identified as a major constituent of the W6B layer of the *C. reinhardtii* cell wall (Goodenough & Heuser, 1985). Taking advantage of a reported protocol for protein extraction and re-crystallization, (Supp. Figure S.6) (Goodenough et al., 1986), we envisioned that the mVenus:GP1 fusion protein could be efficiently released and captured. The protocol consists of a perchlorate treatment to release cell wall proteins and its application on pJPZ11\_GP1 cells induced a fluorescent signal corresponding to mVenus in the supernatant (Figure 4A) and the treated cells did not display any mVenus fluorescent signal

anymore (Figure 4, B). Furthermore, it has been shown that the extracted cell wall proteins can be recrystallized by perchlorate removal (Goodenough et al., 1986). Indeed, we observed similar results after diafiltration. (Supp. Figure S.6). The crystal of the cell wall emitted fluorescence at the typical wavelength of mVenus, and this result further corroborated the presence of mVenus attached to GP1 (Figure 4 C and D). Additionally, the cell wall crystals results indicate that mVenus presence did not disrupt GP1 ability to be anchored and the recrystallization protocol can be used for this system.

Our strategy possesses high potential in biocatalysis due to the ability to produce and immobilize proteins in a biomaterial by adding or removing chaotropic salts (Basso & Serban, 2019), and potentially impacting several applications as the development of biosensors (Bollella et al., 2019) and biocatalysts (Yin et al., 2018). In particular, several strategies for enzyme immobilization have been recently developed using self-assembly proteins (Humenik et al., 2018; Zhang et al., 2019), and biofilm as an anchor (Botyanszki et al., 2015). Using our strategy, we managed to recover 240 µg of cell wall crystal from 22 mg of dry cell weight (DCW), corresponding to ~1% of the cell mass. Interestingly, the entire process involved simple separation techniques, such as separation of cells from the supernatant, dialysis/diafiltration, and isolation and concentration of the desired biomaterial by crystallization. The procedure circumvents the need for chromatographic methods for the purification and concentration of the target protein, significant costly steps in recombinant protein production (Wilken & Nikolov, 2012).

The controlled release of the anchored payload under mild conditions is highly beneficial to diverse applications, such as drug delivery (Santomauro et al., 2018; Shchelikh et al., 2020; Weibel et al., 2005; Yasa et al., 2018) and biocatalyst base process. Interestingly, the cell wall of *C. reinhardtii* is known to be released during the mating process. (Matsuda et al., 1985). This phenomenon is due to physiological changes, particularly the production of autolysin (Adair & Apt, 1990) that is triggered during the sexual reproduction cycle (Jiang & Stern, 2009). The mating process is induced by the use of media depleted of nutrients in which nitrogen concentration was recognized as an important factor (Lewin, 1950; Sager & Granick, 1953).

We investigated varied media composition to induce the release of GP1 from the cell wall (Figure 5). Firstly, we observed only a slight change in the autofluorescence signal, excluding naturally occurring fluorescence variations (Figure 5, condition cc621:cc1690). Secondly, we noted that non-mating related mVenus release occurred, and we hypothesized that the release was related to cell lysis or leaking due to evasion from anchoring (Figure 5, condition cc1690:pJPZ11GP1). Indeed, cell wall proteins can be found in the supernatant of *C. reinhardtii* cultures (Molino et al., 2018). However, the mVenus fluorescence intensity detected on the mating of pJPZ11\_GP1 (mt+) and cc621 (mt-) strains surpassed the values

released in the negative control by 2.3-fold in the same condition. In our experiments, mVenus signal levelled as soon as 20h, with one condition (TAP-N 25%) continuing to increase until 32h. Conditions with lower media concentration (TAP-N 10-25%) prompted to a higher and faster mVenus release, possibly due to the depletion of other nutrients that could further stimulate mating, or enzyme inhibitors dilution (Jaenicke et al., 2001). The conditions with higher concentration of TAP-N (50, 75 and 100%) still presented a high release of mVenus, though in a reduced level compared to TAP-N 10 and 25%. We could still observe mVenus release on the experiment with ddH<sub>2</sub>O, but to a lesser extend compared to the conditions using a dilution of the TAP-N media. Multiple proteases are released during *C. reinhardtii* mating (Luxmi et al., 2018) and the fused protein mVenus:GP1 could be a target for these enzymes. To observe any protease activity on the fused protein, we compared the sizes of free mVenus with the chemically or biologically released sample by western blot probing with an anti-GFP antibody (Supp. Figure S.6). We observed a shift in the band from the sample obtained from mating conditions compared to the sample obtained using the chemical approach. Also, the mVenus band observed in the mating sample has a similar molecular weight than the free mVenus. These findings suggest that the GP1 portion of the fused protein is being released during the mating process. In such cases, the mating approach could be exploited as a biological release mechanism to attain free recombinant protein.

The protein GP1 is composed of 4 domains consisting of a central hydroxyproline-rich sequence and free C and N-terminals (Ferris et al., 2001). The unbounded extremities of GP1 are alluring to the possibility to attach two different proteins. Some systems requires a specific anchoring position such as the *E. coli* system LPP OmpA in which fused proteins are attached to the C-terminal (Georgiou et al., 1996). However, systems with anchoring positions at the C and N terminals have been reported, such as the yeast Aga2p and FLO1 (Matsumoto et al., 2002; Tabuchi et al., 2010; Wang et al., 2005). To assess if GP1 could be functionalized at both ends, we constructed a new vector fusing mCherry to the C-terminal of mVenus:GP1. The initial screening and fluorescent microscopic results indicate that both fluorescent proteins were expressed and displayed at the surface of *C. reinhardtii* (Figure 6). As we could assess so far, the fusion of mCherry to the C-terminal of mVenus:GP1 do not compromise the transformation efficiency or protein expression level (Figure 6 A). In addition, we confirmed the expected 1:1 stoichiometric expression of mVenus and mCherry and their presence in the perchlorate treatment extract (Supp. Figure S.7) indicates the success of anchoring both fluorescent proteins. Finally, mCherry signal co-localized with mVenus in the confocal laser scanning microscope experiment (Figure 6 B), confirming the surface display of both proteins. The versatility of the anchoring position increases the range of applications of the system. For example, it allows the direct fusion of a desired recombinant protein with the anchor (GP1)

and a fluorescent protein. Such layout allows the use of high-throughput methods, such as FACS (Fields et al., 2019), to select top producers.

The cytoplasmic membrane represents another attractive site for surface engineering in *C. reinhardtii* since it hosts diverse functions of the cell, such as nutrient uptake (Pollock et al., 2005) and signaling to flagella movement (Fujiu et al., 2009). The cytoplasmic membrane is also the contact point for the fusion of mating cells and it envelopes the cell flagella (Silflow & Lefebvre, 2001). Hence, the pJPZ11\_MAW8 grants a valuable tool for the study of the cell structure and its functions. For instance, we could easily observe flagellar movement and flagella discs (Video 3) in our experiments. It is noteworthy that flagellar discs are useful to study molecular events taking place in the cytoplasmic membrane during *C. reinhardtii* life cycles, as the migration of agglutinins to the gametic flagellar tip during mating (Ursula W Goodenough, 1993). Since pJPZ11\_MAW8 strain possesses a fluorescent labelled membrane, the flagellar discs can be promptly separated with fluorescent-activated vesicle sorting (Higginbotham et al., 2016), and be used in membrane proteomics.

In conclusion, we have developed two surface display systems for *C. reinhardtii* consisting of the lipid anchor domain MAW8 to label the cytoplasmic membrane and the hydroxyproline-rich GP1 targeting the cell wall. The GP1 anchor supported a larger number of transformants with stronger expression profiles and the use of two release mechanisms. A simple perchlorate treatment allowed to obtain labelled GP1 in solution or solid form, and triggering mating conditions led to the release of the targeted protein with a truncated version of its anchor. Additionally, GP1 allowed to double anchor proteins showing the versatility of the system. Both strategies supports both cell biology studies and biotechnology applications with this microalga.

## Material and Methods

### Assembly of transformation vectors

All restriction enzymes were purchased from New England Biolabs (Ipswich, MA, US). All vectors are based on pAH04 (Molino et al., 2018) as described in Supp. Figure S.9. The vectors were constructed in pBlueScript II + KS (pBSII). To generate pJPZ constructs, expression vector and anchor sequences were purchased from (GenScript USA Inc, NJ, USA). Cloning was performed in the BamHI and NdeI site of the pJPZ11 vector to incorporate the anchors to the expression vector. The anchors were selected from four possible anchoring strategies in the cell membrane and cell wall. Namely by transmembrane domain, GPI anchoring, covalently linkage to the cell wall, and non-covalently linkage to cell wall. The cloning resulted in the vectors pJPZ11\_HAP2, pJPZ11\_MAW8, pJPZ11\_GP1, all harboring their specific anchor sequence. The vector pJPZ11\_GP1 mCherry was prepared by SLICE (Y.



Zhang et al., 2012) with a DH5α extract following the procedure described in (Okegawa & Motohashi, 2015). The vector pJPZ11\_GP1 was prepared linearizing it with NdeI following NEB protocol and gel purification with QIAEX II Gel Extraction Kit (QIAGEN). The insert was prepared by PCR with the protocol described in (dx.doi.org/10.17504/protocols.io.bprimm4e), with a homology of 30 bp homology at 5' and 39 bp homology at 3' region inserting a linker GGS 2X, mCherry and removing the GP1 stop codon. The final primers were forward 5' CTCGATTGACGCGGTCGGCCTCAACCTGAAGGGCGGCGGCAGCGGCGGCGGCTCGA TGGTGTCCAAGGGCGAGGAGG 3' and reverse 5' GCCAGACTTACCTCCATTACACGGAGCGGcatatgTTACTTGTACAGCTCGTCCATGCCG CC3' used with a mCherry DNA template. Final sequences can be found at (<http://doi.org/10.5281/zenodo.4585410>). All vectors maps can be found at Supp. Figure S.9 and the protein formation scheme at Supp. Animation 1.

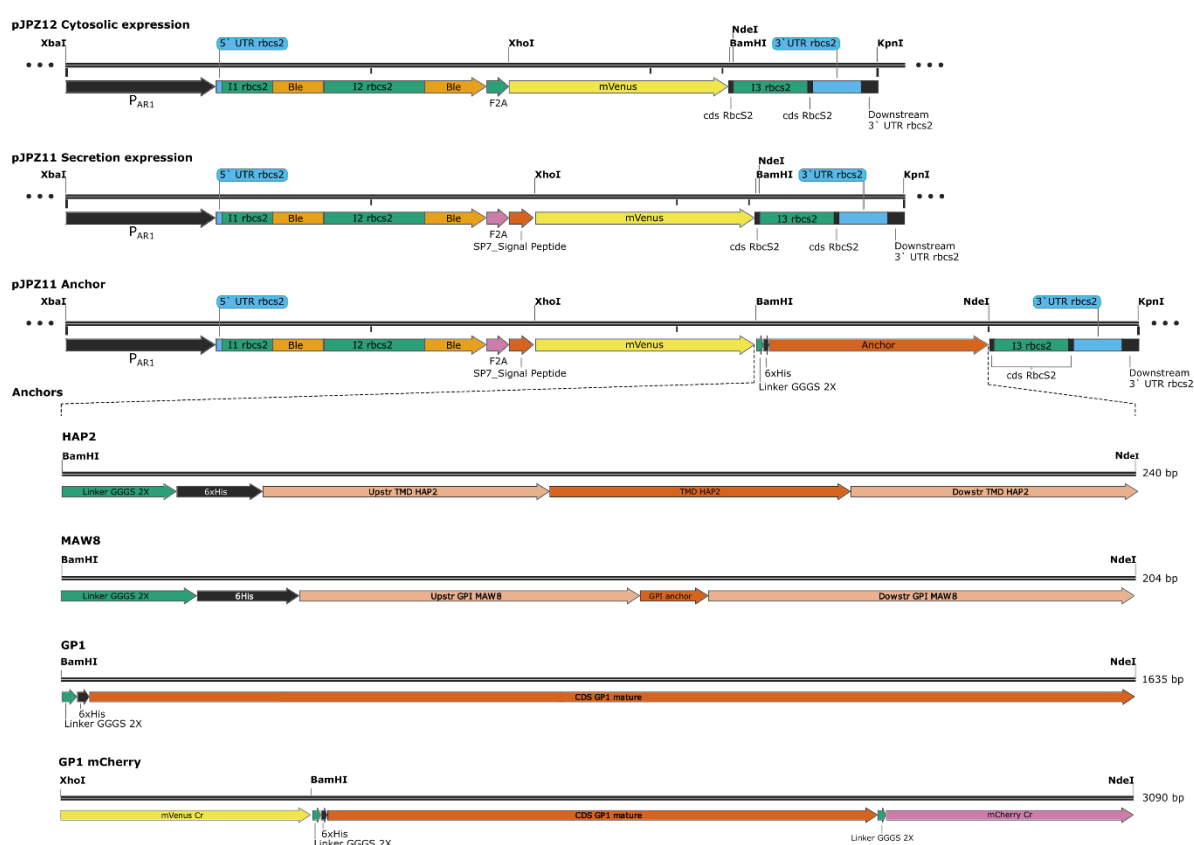

**Supp. Figure S.9:** Constructs used for the nuclear expression in *Chlamydomonas reinhardtii*. Vector maps represent the constructs used in the study. All vectors are based on pAH04 from (Molino, de Carvalho, and Mayfield 2018). Vector maps represent the constructs used in the study. pJPZ12: cytosolic expression of mVenus. pJPZ11: secreting expression of mVenus and base for the anchored constructs. All vectors are composed of: P<sub>AR1</sub>: chimeric promoter with HSP70 enhancer and rbcS2 promoter; Ble: bleomycin resistance marker; F2A: FMDV 2A self-cleaving peptide; SP7: native signal peptide identified in (Molino et al., 2018); mVenus Cr: the mVenus fluorescent protein codon optimized for *C. reinhardtii*; Linker GGS 2X: linker composed of three glycine and one serine repeated two times; 6xHis: hexa-histidine tag; Anchor: HAP2 transmembrane domain (TMD) region, MAW8, GP1 entire mature cds sequence; 5'UTR rbcS2: 5' untranslated region of rbcS2; 3'UTR rbcS2: 3' untranslated region of rbcS2; I1-3 rbcS2: introns in the order that they occur in the rbcS2 gene; GP1 mCherry is the double anchored proteins. Backbone: pBluescript II.

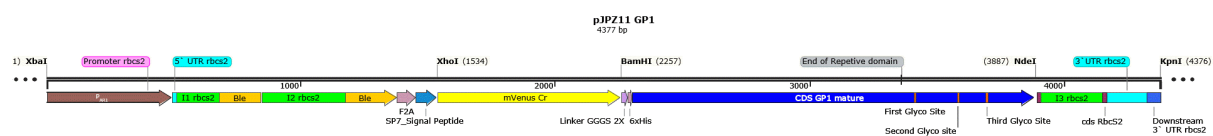

**Supp. Animation 1:** Schematic representation of fused protein generation with our pJPZ11\_GP1 vector.

**Plate reader settings**

The plate reader was set to measure fluorescence of mVenus, mCherry, chlorophyll and read the absorbance at 750nm of *C. reinhardtii* cultures. The fluorescence measurements were set as Table 2:

Table 2: Fluorescence measurements settings in Synergy H1 plate reader (BioTek Instruments, VT, USA).

| Channel     | Excitation (nm) | Emission (nm) | Gain | Optics position |
|-------------|-----------------|---------------|------|-----------------|
| Chlorophyll | 440             | 680           | 70   | bottom          |
| mVenus      | 500             | 530           | 120  | bottom          |
| mCherry     | 583             | 613           | 150  | bottom          |

All samples were read with 100 µL, unless otherwise stated.

**Culture conditions and *C. reinhardtii* transformation**

All transformations were performed in the *C. reinhardtii* cc1690 (mt+) strain with intact cell wall (Chlamydomonas Stock Center, St. Paul, MN, USA). The growth curve was obtained as described in (dx.doi.org/10.17504/protocols.io.bpvbmn2n), with 100 uL samples of 50mL cultures in Synergy H1 plate reader, from three biological replicates for each strain studied. The cultures were grown in TAP medium (Gorman and Levine 1965) at 25°C under constant illumination of 80 µmol photons/m<sup>2</sup>s at 150 rpm on a rotary shaker. The DCW was determined as described in (dx.doi.org/10.17504/protocols.io.bkrbkv2n). Transformation of *C. reinhardtii* was achieved by electroporation, as described in (dx.doi.org/10.17504/protocols.io.kfkctkw, version 2), and visually described in video 4. Briefly, cells were grown to mid-log phase density (3–6 × 10<sup>6</sup> cells/mL) in a TAP medium at 25°C under constant illumination of 80 µmol

photons/m<sup>2</sup>s at 150 rpm on a rotary shaker. Cells were pelleted by centrifugation at 3000 g for 10 min and resuspended to 3–6 × 10<sup>8</sup> cells/mL in a MAX Efficiency™ Transformation Reagent for Algae (A24229, Thermo Fischer Scientific). A 250 µL suspension of cells and 500 ng of double-digested (*Xba*I and *Kpn*I) vector plasmid were incubated for 5–10 min on ice in a 4-mm Gene Pulser®/MicroPulser™ cuvette (BioRad, Hercules, CA). GenePulser XCell™ (BioRad, Hercules, CA) was used to electroporate the cell/vector mix, with a time constant protocol set to 2000 V/cm and 20 µs. Electroporated cells were resuspended in 10 mL of TAP/40 mM sucrose medium and agitated at 50 rpm in room light for 18 h. After recovery, the cells were pelleted by centrifugation at 3000 g for 10 min and resuspended in 600 µL of TAP medium. Equal amounts of cells were spread to two TAP/agar plates supplemented with 5 and 10 µg/mL zeocin, respectively. We incubated the cells in light (60 µmol photons/m<sup>2</sup>s), 25°C, until colonies were observable (Video 5).

### Strain screening

The constructs were screened by picking 96 colonies from the selection plates as described in ([dx.doi.org/10.17504/protocols.io.big9kbz6](https://doi.org/10.17504/protocols.io.big9kbz6)). The colonies were grown in 160 µL of TAP medium for 5 days in black clear bottom 96 well plates (CellCarrier-96 Black, 6005550, PerkinElmer Inc, USA), sealed with a paper tape. Cultivation was performed on a microplate shaker (CRP-18X, Capp Rondo Plate Shaker, CAPP, Germany), set to 900 rpm, under constant illumination (60 µmol photons/m<sup>2</sup>s). Then, fluorescence was measured using a Synergy H1 plate reader (BioTek Instruments, VT, USA) with the settings described in TABLE 2.. We grew 96 independent replicates of the parental wild-type strain cc1690 as a negative control to elucidate the background fluorescence in our experimental setup. To determine an empirical cutoff (dashed line in Figure 2) we average the 96 RFU results from cc1690 added three standard deviations.

### Cellular fluorescence localization

Transformed strains were grown in TAP medium to the late log phase at 25°C under constant illumination of 80 µmol photons/m<sup>2</sup>s at 150 rpm on a rotary shaker. Live cells were observed in agarose pads prepared as described in ([dx.doi.org/10.17504/protocols.io.bkn8kvhw](https://doi.org/10.17504/protocols.io.bkn8kvhw)). The cells were added to TAP/1% agarose pads prepared with Frame-Seal™ Slide Chambers, 15 x 15 mm, 65 µl in a glass slide and a cover slip prior to image acquisition. Life-cell imaging was acquired in an automated inverted confocal laser scanning microscope (Leica DMI8 CS with AFC, Model SP8). mVenus fluorescence was observed with a laser line set at 515 nm at 10% to excite mVenus and the emission detected with HyD hybrid detector set at 519nm - 575nm on counting mode. mCherry fluorescence was observed with a laser line set at 580 nm at 10% to excite mCherry and the emission detected with HyD hybrid detector set at 590nm - 630nm on counting mode. For

chlorophyll, we used a laser line set at 470 nm at 0.4% to excite chlorophyll and the emission detected with the HyD hybrid detector set at 650nm - 800nm on counting mode. The microscope settings were kept constant for each microscope image set and were acquired in sequence mode for mVenus and mCherry. All pictures were analyzed by Fiji, an ImageJ distribution software (Abràmoff et al., 2004; Schindelin et al., 2012) keeping the same settings for each group of pictures. Brightness was adjusted using FIJI, with a constant setting for all pictures, unless otherwise stated. For videos, we used a Spinning disk confocal microscope (Olympus IXplore SpinSR10 super resolution imaging system). The full system description can be found at Supplementary File 1 (10.5281/zenodo.4739722). The laser line 488 nm was used to excite the sample, and the emission filters BP 525/50 and BP 617/73 were used to observe respectively mVenus and chlorophyll. For samples expressing mCherry, the laser line 561 nm was also used.

### **Cell motility**

To estimate cell motility speed, we performed the protocol described in [dx.doi.org/10.17504/protocols.io.bsw5nfg6](https://doi.org/10.17504/protocols.io.bsw5nfg6). We cultured 3 biological replicates on the culture conditions described above, followed by harvesting 1mL of culture by centrifugation at 3000 g for 3 min. The supernatant was removed by pipetting and the cells were washed with 1 mL of ddH<sub>2</sub>O, followed by the same pelleting protocol and supernatant removal. The cells were resuspended in 1 mL of ddH<sub>2</sub>O and used for the motility experiment. The cells were kept in the dark until the onset of the experiment, that was carried out in a glass slide with a Frame-Seal™ Slide Chambers, 15 x 15 mm, 65 µl and sealed with a cover slip. The imaging was acquired using the spinning disk confocal microscope set as described in [dx.doi.org/10.17504/protocols.io.bsw5nfg6](https://doi.org/10.17504/protocols.io.bsw5nfg6), with acquisitions interval of 100 µs. A total of 150 frames were recorded for each culture in three technical replicates. The images were analyzed in ImageJ with the plugin TrackMate (Release 6.0.1) (Tinevez et al., 2017), with the settings described in 10.5281/zenodo.4739662, and the workflow can be seen at Video 6. The average speed data generated was further analyzed with the code available at 10.5281/zenodo.4739728.

### **Chemical extraction of cell wall components and recrystallization**

To identify the presence of the fused protein in the cell wall we performed extraction of the chaotropic soluble portion of the *C. reinhardtii* cell wall, adapting the protocol described by (U. W. Goodenough et al., 1986). To that end, we culture the strains for 5 days before, a sample of 1 mL of the culture was pellet by centrifugation at 3000 g for 2 min. The supernatant was removed by pipetting and the cells were washed with 1 mL of ddH<sub>2</sub>O, followed by the

same pelleting protocol and supernatant removal. The cell pellet was resuspended in 150  $\mu$ L of a 2M sodium perchlorate solution. The mixture was centrifuged at 20000 g for 1 min and the supernatant recovered for fluorescence reading.

To recrystallize the cell wall a larger number of cells were used. A sample of 40 mL of the cultures was centrifuged at 3000 g for 3 min, supernatant was removed by decantation, cells were washed with 40 mL of ddH<sub>2</sub>O, followed by the same pelleting protocol and supernatant removal. The cell pellet was resuspended with 1 mL of 2M sodium perchlorate solution (Approximately the double of the cell pellet volume). The mixture was transferred to a 1.5 mL microcentrifuge tube and centrifuged at 20000 g for 1 min. Approximately 1 mL of the supernatant could be obtained from which 900  $\mu$ L was used for recrystallization. Recrystallization of the chaotropic soluble components of the cell wall was achieved by a diafiltration protocol. Briefly, 500  $\mu$ L of the perchlorate extract was filtered with a 30K centrifugal filter (Amicon Ultra - 0.5mL, Ultracel - 30K, UFC503096, Merck KGaA, Germany), at 14000 g, until concentrated to 50  $\mu$ L, followed by the addition of the final 400  $\mu$ L of extract. Sample was concentrated as previously, followed by three steps adding 450  $\mu$ L of ddH<sub>2</sub>O after each centrifugation step, diafiltrating the sample. The filter membrane was placed inverted in a new collection tube to recover the cell wall crystal.

### **Cell wall crystal photodocumentation**

Cell walls generated by the recrystallization protocol was checked for the maintenance of mVenus fluorescence signal. The images were acquired exploiting proteins autofluorescence when exposed to UV light, and mVenus fluorescence when exposed to green light. To the images acquisition we used the photodocumentation system from Biorad (Universal Hood III, Biorad Laboratories, CA, USA), controlled with the software Image Lab version 5.2.1 build 11. We setup the equipment for protein detection with trans UV excitation (302 nm UV lamps) and the system standard filter (548-630 nm). For mVenus fluorescence detection we setup the equipment with green epi-illumination (520-545nm) and the system standard filter (548-630 nm).

### **Mating experiments**

To explore the biological alterations developed during mating in *C. reinhardtii*, we performed mating experiments based on (Jiang & Stern, 2009) with modifications. We grew the cells for 5 days, as described in ([dx.doi.org/10.17504/protocols.io.bkrskv6e](https://doi.org/10.17504/protocols.io.bkrskv6e)), and washed a 1 mL sample of each mating type with ddH<sub>2</sub>O, by centrifuging the sample at 3000g for 3 min, remove the supernatant by pipetting, and 1mL of ddH<sub>2</sub>O. A repetition of this step with TAP-N 25% yielded the cells suspension used for mating experiment for microscopy. The last step was to add 750  $\mu$ L of each cell in a 1.5 mL microcentrifuge tube, laid in the culturing shaker. For the kinetic experiment, we initially prepared the cells as described above, but

resuspending the cells in culturing media lacking the nitrogen source (TAP-N), diluted to different concentrations. Later we added 750  $\mu$ L of each cell in a well of a 24 well plate laid in the culturing shaker. The mixture of cc621 (mt-) and cc1690 (mt+) was used as a fluorescence background check, the mixture of cc1690 (mt+) and pJPZ11\_GP1 (mt+) as a negative control for mating, and finally cc621 (mt-) and pJPZ11\_GP1 (mt+) as the mating test. To explore the effect of media constituents in the mating process, we prepared cells resuspended in different mating media, varying the final concentration of TAP-N media. We tested full TAP-N media and dilutions with 75%, 50%, 25% and 10% of TAP-N, and finally only ddH<sub>2</sub>O. Samples of 130  $\mu$ L were taken over 33h, each sample was centrifuged at 20000g for 1 min, and 100  $\mu$ L of the supernatant used for fluorescence readings.

## Western Blot

To identify the recombinant proteins expressed in the study we prepared the samples as follow. The supernatant sample of a pJPZ11 culture grown for 5 days in standard condition was concentrated ~40 fold by filtration using a pierce protein concentrator (Pierce™ Protein Concentrator PES, 10K MWCO, 5-20 mL, Thermo Fisher Scientific, IL, USA). The mating sample and perchlorate sample were diluted to equalize the total amount of protein load per well (12.5  $\mu$ g). The samples were prepared for SDS-PAGE by mixing them with Laemmli SDS reducing sample buffer (J61337.AC, Alfa Aesar, Germany), followed by heat denaturation at 98 °C for 10 min. We used 5  $\mu$ L of pre-stained protein ladder (26619, Thermo Scientific, MA, USA). We used a precast stain-free gel, following the manufacturer instruction (4–15% Mini-PROTEAN® TGX Stain-Free™ Protein Gels, 4568084, BioRad, Hercules, CA) with the gel apparatus (Mini-PROTEAN Tetra Cell, BioRad, Hercules, CA). Protein transfer to the PVDF membrane was performed subsequently following manufacturer's instructions for the membrane kit (Trans-Blot Turbo Midi 0.2  $\mu$ m PVDF, 1704157, BioRad, Hercules, CA) and the transfer apparatus (Trans-Blot® Turbo™ Transfer System, 1704150, BioRad, Hercules, CA). After blocking with 3% BSA in TBST (0.2 M Tris, 1.37 M NaCl, 0.1% Tween-20, pH 7.6) at room temperature for 1h on a rocker, membranes were probed with anti-GFP 1:3000 antibody conjugated to a peroxidase (SAB2702198, Merck KGaA, Germany) in the blocking buffer overnight at 4 °C on a rocker. The membrane was later washed with 50 mL of TBST (0.2 M Tris, 1.37 M NaCl, 0.1% Tween-20, pH 7.6) for 5 min, repeated three times. The detection was achieved with a colorimetric detection system (HRP conjugate substrate kit, 170-6431, BioRad, Hercules, CA), following the manufacturer instructions.



## Data analysis

R Statistic version 3.6.3 (2020-02-29) running in the RStudio v1.2.5042 IDE was used to import and process data, generate the statistical summary, and generate the plots. The codes used are deposited at Zenodo (10.5281/zenodo.4739728). For the screening method, all constructs were used to transform the cc1690 strain, and 96 colonies of each transformation were collected and evaluated by fluorescence measurements, resulting in 96 independent data points for each construct in the initial screening. The fluorescence results are expressed as dot blots and the statistical summary of the transformation is displayed in Table 1. Strains were classified as positive when the fluorescence measurement was superior to the average of 96 independent wild-type replicates plus three standard deviations. For the results of flask cultures, errors bars indicate the standard deviation of three biological replicates for each strain. For the comparison between strains with perchlorate treatment, the results were analyzed by ANOVA. The growth curve analysis was performed as described in (Padfield et al., 2020), applying part of the R code available. For the double anchoring strategy, a linear regression analysis was performed applying mCherry fluorescence signal as predictor to mVenus fluorescence for the strain expressing only mVenus (pJPZ11\_GP1) and for the strain expressing mVenus and mCherry (pJPZ11\_GP1mCherry). A correlation of mVenus and mCherry signal indicates expression of both proteins simultaneously.

## Acknowledgements

The authors acknowledge the assistance and support of the Center for Microscopy and Image Analysis, University of Zurich, in the person of Dr. Joana Delgado Martins. Green surfing is a research project within the program of Microbials 2018 by Gebert R f Stiftung (Microbials: project GRS 061/18). We acknowledge the contribution of Lukas Hoff in preparing the ImageJ macro used in microscopy pictures analysis.

## Authors Details:

João Vitor Dutra Molino

**Contribution:** Conceptualization, Methodology, Software, Validation, Formal Analysis, Investigation, Writing – Original Draft Preparation, Writing – Review & Editing, Visualization, Funding Acquisition.

**Competing interests:** No competing interests declared.

Roberta Carpine

**Contribution:** Formal Analysis, Investigation, Writing – Original Draft Preparation, Writing – Review & Editing,

**Competing interests:** No competing interests declared.

Karl Gademann

**Contribution:** Validation, Resources, Writing – Review & Editing, Supervision, Funding Acquisition

**Competing interests:** No competing interests declared.

Stephen Mayfield

**Contribution:** Conceptualization, Writing – Review & Editing, Supervision, Funding Acquisition

**Competing interests:** No competing interests declared.

Simon Sieber:

**Contribution:** Validation, Writing – Review & Editing, Project Administration, Funding Acquisition

Competing interests: No competing interests declared.

## References

- Abràmoff, Magalhães, P. J., & Ram, S. (2004). Image Processing with ImageJ. *Biophotonics International*, 11(7), 36–42.
- Adair, W S, & Apt, K. E. (1990). Cell wall regeneration in Chlamydomonas: accumulation of mRNAs encoding cell wall hydroxyproline-rich glycoproteins. *Proceedings of the National Academy of Sciences of the United States of America*, 87(19), 7355–7359. <https://doi.org/10.1073/pnas.87.19.7355>
- Adair, W Steven, Steinmetz, S. A., Mattson, D. M., Goodenough, U. W., & Heuser, J. E. (1987). Nucleated Assembly of Chlamydomonas and Volvox Cell Walls. *The Journal of Cell Biology*, 105, 2373–2382.
- Andreu, C., & Olmo, M. Í del. (2018). Yeast arming systems : pros and cons of different protein anchors and other elements required for display. *Applied Microbiology and Biotechnology*, 102(6), 2543–2561.
- Barone, P. W., Wiebe, M. E., Leung, J. C., Hussein, I. T. M., Keumurian, F. J., Bouressa, J., Brussel, A., Chen, D., Chong, M., Dehghani, H., Gerentes, L., Gilbert, J., Gold, D., Kiss, R., Kreil, T. R., Labatut, R., Li, Y., Müllberg, J., Mallet, L., Menzel, C., Moody, M., Monpoeho, S., Murphy, M., Plavsic, M., Roth, N.J., Roush, D., Ruffing, M., Schicho, R., Snyder, R., Stark, D., Zhang, C., Wolfrum, J., Sinskey, A.J., Springs, S. L. (2020). Viral contamination in biologic manufacture and implications for emerging therapies. *Nat. Biotechnol.*, 38(5), 563–572. <https://doi.org/10.1038/s41587-020-0507-2>
- Basso, A., & Serban, S. (2019). Industrial applications of immobilized enzymes — A review. *Molecular Catalysis*, 479, 110607. <https://doi.org/10.1016/j.mcat.2019.110607>
- Berman, H. M., Westbrook, J., Feng, Z., Gilliland, G., Bhat, T. N., Weissig, H., Shindyalov, I. N., & Bourne, P. E. (2000). The Protein Data Bank. *Nucleic Acids Research*, 28(1), 235–242. <https://doi.org/10.1093/nar/28.1.235>
- Bethencourt, V. (2009). Virus stalls Genzyme plant. *Nature Biotechnology*, 27(8), 681–681. <https://doi.org/10.1038/nbt0809-681a>
- Boder, E. T., & Wittrup, K. D. (1997). Yeast surface display for screening combinatorial polypeptide libraries. *Nature Biotechnology*, 15(6), 553–557. <https://doi.org/https://doi.org/10.1038/nbt0697-553>
- Bollella, P., Sharma, S., Cass, A. E. G., & Antiochia, R. (2019). Microneedle-based biosensor for minimally-invasive lactate detection. *Biosens. Bioelectron.*, 123, 152–159. <https://doi.org/10.1016/j.bios.2018.08.010>
- Botyanszki, Z., Tay, P. K. R., Nguyen, P. Q., Nussbaumer, M. G., & Joshi, N. S. (2015). Engineered catalytic biofilms: Site-specific enzyme immobilization onto E. coli curli nanofibers. *Biotechnol. Bioeng.*, 112(10), 2016–2024. <https://doi.org/10.1002/bit.25638>
- Bruun, T.-H., Grassmann, V., Zimmer, B., Asbach, B., Peterhoff, D., Kliche, A., & Wagner, R. (2017). Mammalian cell surface display for monoclonal antibody-based FACS selection of viral envelope proteins. *MAbs*, 0862, 0–0. <https://doi.org/10.1080/19420862.2017.1364824>
- Chen, R. F. (1967). Fluorescence Quantum Yields of Tryptophan and Tyrosine. In *Analytical Letters* (Vol. 1, Issue 1, pp. 35–42). <https://doi.org/10.1080/00032716708051097>
- Chen, W., & Georgiou, G. (2002). Cell-Surface display of heterologous proteins: From high-throughput screening to environmental applications. *Biotechnol. Bioeng.*, 79(5), 496–503. <https://doi.org/10.1002/bit.10407>
- Cross, F. R., & Umen, J. G. (2015). The Chlamydomonas Cell Cycle. *The Plant Journal*, 82(3), 370–392. <https://doi.org/10.1111/tpj.12795>
- Dietmaier, W., Fabry, S., Huber, H., & Schmitt, R. (1995). Analysis of a family of ypt genes and their products from Chlamydomonas reinhardtii. *Gene*, 158(1), 41–50. [https://doi.org/10.1016/0378-1119\(95\)00052-8](https://doi.org/10.1016/0378-1119(95)00052-8)
- Fedeson, D. T., & Ducat, D. C. (2017). Cyanobacterial Surface Display System Mediates Engineered Interspecies and Abiotic Binding. *ACS Synth. Biol.* 6, 367–374. <https://doi.org/10.1021/acssynbio.6b00254>
- Ferri, S., Nakamura, M., Ito, A., Nakajima, M., Abe, K., Kojima, K., & Sode, K. (2015). Efficient surface-display of autotransporter proteins in cyanobacteria. *Algal Research*,

- 12, 337–340. <https://doi.org/10.1016/j.algal.2015.09.013>
- Ferris, P. J., Waffenschmidt, S., Umen, J. G., Lin, H., Lee, J., Ishida, K., Kubo, T., Lau, J., & Goodenough, U. W. (2005). Plus and Minus Sexual Agglutinins from *Chlamydomonas reinhardtii*. *The Plant Cell*, 17, 597–615. <https://doi.org/10.1105/tpc.104.028035.2>
- Ferris, P. J., Woessner, J. P., Waffenschmidt, S., Kilz, S., Drees, J., & Goodenough, U. W. (2001). Glycosylated Polyrpiline II Rods with Kinks as a Structural Motif in Plant Hydroxyproline-Rice Glycoproteins. *Biochemistry*, 40, 2978–2987.
- Fields, F. J., Lejzerowicz, F., Schroeder, D., Ngoi, S. M., Tran, M., McDonald, D., Jiang, L., Chang, J. T., Knight, R., & Mayfield, S. (2020). Effects of the microalgae *Chlamydomonas* on gastrointestinal health. *Journal of Functional Foods*, 65, 103738. <https://doi.org/10.1016/j.jff.2019.103738>
- Fields, F. J., Ostrand, J. T., Tran, M., & Mayfield, S. P. (2019). Nuclear genome shuffling significantly increases production of chloroplast-based recombinant protein in *Chlamydomonas reinhardtii*. *Algal Research*, 41, 101523. <https://doi.org/10.1016/j.algal.2019.101523>
- Freudl, R., MacIntyre, S., Degen, M., & Henning, U. (1986). Cell Surface Exposure of the Outer Membrane Protein OmpA of *Escherichia coli* K-12. *Journal of Molecular Biology*, 188(3), 491–494. [https://doi.org/http://doi.org/10.1016/0022-2836\(86\)90171-3](https://doi.org/http://doi.org/10.1016/0022-2836(86)90171-3)
- Fujiu, K., Nakayama, Y., Yanagisawa, A., Sokabe, M., & Yoshimura, K. (2009). *Chlamydomonas* CAV2 Encodes a Voltage- Dependent Calcium Channel Required for the Flagellar Waveform Conversion. *Current Biology*, 19(2), 133–139. <https://doi.org/10.1016/j.cub.2008.11.068>
- Georgiou, G., L.Stephens, D., Stathopoulos, Christos Poetschke, H. L., Mendenhalls, J., Earhart, C. F., & Departments. (1996). Display of b-lactamase on the *Escherichia coli* surface: outer membrane phenotypes conferred by Lpp'-OmpA'-b-lactamase fusions. *Protein Engineering*, 9(2), 239–247.
- Gimpel, J. A., Hyun, J. S., Schoepp, N. G., & Mayfield, S. P. (2015). Production of recombinant proteins in microalgae at pilot greenhouse scale. In *Biotechnology and Bioengineering* (Vol. 112, Issue 2, pp. 339–345). <https://doi.org/10.1002/bit.25357>
- Goodenough, U. W., Gebhart, B., Mecham, R., & Heuser, J. E. (1986). Crystals of the *Chlamydomonas reinhardtii* cell wall: Polymerization, depolymerization, and purification of glycoprotein monomers. *Journal of Cell Biology*, 103(2), 405–417. <https://doi.org/10.1083/jcb.103.2.405>
- Goodenough, U W, & Heuser, J. E. (1985). The *Chlamydomonas* cell wall and its constituent glycoproteins analyzed by the quick-freeze, deep-etch technique. *J. Cell Biol.*, 101(4), 1550–1568. <https://doi.org/10.1083/jcb.101.4.1550>
- Goodenough, Ursula W. (1993). Tipping of Flagellar Agglutinins by Gametes of *Chlamydomonas reinhardtii*. *Cell Motility and the Cytoskeleton*, 25, 179–189.
- Goodenough, Ursula W, & Heuser, J. E. (1988). Molecular organization of cell-wall crystals from *Chlamydomonas reinhardtii* and *Volvox carteri*. *Journal of Cell Science*, 90, 717–733.
- Goodenough, Ursula W, & Heuser, J. E. (1999). Deep-etch analysis of adhesion complexes between gametic flagellar membranes of *Chlamydomonas reinhardtii* (Chlorophyceae). *Journal of Phycology*, 767(May), 756–767. <https://doi.org/10.1046/j.1529-8817.1999.3540756.x>
- Goodsell, D. S., Autin, L., & Olson, A. J. (2019). Illustrate: Software for Biomolecular Illustration. *Structure*, 27(11), 1716–1720.e1. <https://doi.org/10.1016/j.str.2019.08.011>
- Grabherr, R., Ernst, W., Oker-Blom, C., & Jones, I. (2001). Developments in the use of baculoviruses for the surface display of complex eukaryotic proteins. *Trends in Biotechnology*, 19(6), 231–236. [https://doi.org/10.1016/S0167-7799\(01\)01610-9](https://doi.org/10.1016/S0167-7799(01)01610-9)
- Harris, E. H. (2001). *Chlamydomonas* as a model organism. *Annu. Rev. Plant Physiol. Plant Mol. Biol.*, 52(1), 363–406. <https://doi.org/10.1146/annurev.arplant.52.1.363>
- Higginbotham, J. N., Zhang, Q., Jeppesen, D. K., Scott, A. M., Manning, H. C., Ochieng, J., Franklin, J. L., & Coffey, R. J. (2016). Identification and characterization of EGF receptor in individual exosomes by fluorescence-activated vesicle sorting. *J Extracell*

- Vesicles, 5, 29254. <https://doi.org/10.3402/jev.v5.29254>
- Huang, B., Ramanis, Z., & Luck, D. J. L. (1982). Suppressor Regulatory Mutations in Chlamydomonas Reveal a Mechanism for Flagellar Function and. *Cell*, 28(1), 115–124. [https://doi.org/10.1016/0092-8674\(82\)90381-6](https://doi.org/10.1016/0092-8674(82)90381-6)
- Humenik, M., Mohrand, M., & Scheibel, T. (2018). Self-Assembly of Spider Silk-Fusion Proteins Comprising Enzymatic and Fluorescence Activity. *Bioconjug. Chem.*, 29(4), 898–904. <https://doi.org/10.1021/acs.bioconjchem.7b00759>
- Jaenicke, L., Kuhne, W., Spessert, R., Wahle, U., & Waffenschmidt, S. (2001). Cell-wall lytic enzymes (autolysins) of Chlamydomonas reinhardtii are (hydroxy)proline-specific proteases. *Eur. J. Biochem*, 491(1987), 485–491.
- Jiang, X., & Stern, D. (2009). Mating and tetrad separation of Chlamydomonas reinhardtii for genetic analysis. *Journal of Visualized Experiments*, 30, 2–3. <https://doi.org/10.3791/1274>
- Joo, S., Nishimura, Y., Cronmiller, E., Hong, R. H., Kariyawasam, T., Wang, M. H., Shao, N. C., Akkad, S.-E.-D. El, Suzuki, T., Higashiyama, T., Jin, E., & Lee, J.-H. (2017). Gene regulatory networks for the haploid-to-diploid transition of Chlamydomonas reinhardtii. *Plant Physiology*, 175, 314–332. <https://doi.org/10.1104/pp.17.00731>
- Jung, H. C., Lebeault, J. M., & Pan, J. G. (1998). Surface display of Zymomonas mobilis levansucrase by using the ice-nucleation protein of Pseudomonas syringae. *Nat. Biotechnol.*, 16(6), 576–580. <https://doi.org/10.1038/nbt0698-576>
- Kerschgens, I. P., & Gademann, K. (2018). Antibiotic Algae by Chemical Surface Engineering. *ChemBioChem*, 19(5), 439–443. <https://doi.org/10.1002/cbic.201700553>
- Kim, J., & Schumann, A. E. W. (2009). Display of proteins on Bacillus subtilis endospores. *Cellular and Molecular Life Sciences*, 66(19), 3127–3136. <https://doi.org/10.1007/s00018-009-0067-6>
- Kremers, G., Goedhart, J., Munster, E. B. Van, & Gadella, T. W. J. (2006). Cyan and Yellow Super Fluorescent Proteins with Improved Brightness, Protein Folding, and FRET Förster Radius. *Biochemistry*, 45(21), 6570–6580. <https://doi.org/10.1021/bi0516273>
- Kubo, T., Kaida, S., Abe, J., Saito, T., & Fukuzawa, H. (2009). The Chlamydomonas Hatching Enzyme, Sporagin, is Expressed in Specific Phases of the Cell Cycle and is Localized to the Flagella of Daughter Cells Within the Sporangial Cell Wall. *Plant and Cell Physiology*, 50(3), 572–583. <https://doi.org/10.1093/pcp/pcp016>
- Kumar, R., & Kumar, P. (2019). Yeast-based vaccines: New perspective in vaccine development and application. *FEMS Yeast Res.*, 19(2), foz007. <https://doi.org/10.1093/femsyr/foz007>
- Kuwada, Y. (1916). Some Peculiarities Observed in the Culture of Chlamydomonas. *Bot. Mag. Tokyo*, 30(3), 347–358. <https://doi.org/10.15281/jplantres1887.30.347>
- Lambert, T. J. (2019). FPbase: a community-editable fluorescent protein database. *Nature Methods*, 16(4), 277–278. <https://doi.org/10.1038/s41592-019-0352-8>
- Leonardo, R. Di, Di Leonardo, R., Angelani, L., Dell’Arciprete, D., Ruocco, G., Iebba, V., Schippa, S., Conte, M. P., Mecarini, F., De Angelis, F., & Di Fabrizio, E. (2010). Bacterial ratchet motors. In *Proceedings of the National Academy of Sciences* 107(21), 9541–9545. <https://doi.org/10.1073/pnas.0910426107>
- Lewin, R. A. (1950). Gamete behaviour in Chlamydomonas. *Nature*, 166(4210), 76. <https://doi.org/10.1038/166076a0>
- Liu, Y., Pei, J., Grishin, N., & Snell, W. J. (2015). The cytoplasmic domain of the gamete membrane fusion protein HAP2 targets the protein to the fusion site in Chlamydomonas and regulates the fusion reaction. *Development*, 142(5), 962–971. <https://doi.org/10.1242/dev.118844>
- Liu, Yanjie, Tewari, R., Ning, J., Blagborough, A. M., Garbom, S., Pei, J., Grishin, N. V., Steele, R. E., Sinden, R. E., Snell, W. J., & Billker, O. (2008). The conserved plant sterility gene HAP2 functions after attachment of fusogenic membranes in Chlamydomonas and Plasmodium gametes. *Genes & Development*, 22(8), 1051–1068.



- <https://doi.org/10.1101/gad.1656508.plasma>
- Luxmi, R., Blaby-Haas, C., Kumar, D., Rauniyar, N., King, S. M., Mains, R. E., & Eipper, B. A. (2018). Proteases shape the chlamydomonas secretome: Comparison to classical neuropeptide processing machinery. *Proteomes*, 6(4), 1–20. <https://doi.org/10.3390/proteomes6040036>
- Matsuda, Y., Saito, T., Yamaguchi, T., & Kawase, H. (1985). Cell wall lytic enzyme released by mating gametes of *Chlamydomonas reinhardtii* is a metalloprotease and digests the sodium perchlorate-insoluble component of cell wall. *Journal of Biological Chemistry*, 260(10), 6373–6377.
- Matsumoto, T., Fukuda, H., Ueda, M., Tanaka, A., & Kondo, A. (2002). Construction of yeast strains with high cell surface lipase activity by using novel display systems based on the Flo1p flocculation functional domain. *Applied and Environmental Microbiology*, 68(9), 4517–4522. <https://doi.org/10.1128/AEM.68.9.4517-4522.2002>
- Maul, J. E., Lilly, J. W., Cui, L., Claude, W., Miller, W., Harris, E. H., & Stern, D. B. (2002). The *Chlamydomonas reinhardtii* Plastid Chromosome : Islands of Genes in a Sea of Repeats. *The Plant Cell*, 14, 2659–2679. <https://doi.org/10.1105/tpc.006155.present>
- Mayfield, S. P., Franklin, S. E., & Lerner, R. a. (2003). Expression and assembly of a fully active antibody in algae. *Proceedings of the National Academy of Sciences of the United States of America*, 100(2), 438–442. <https://doi.org/10.1073/pnas.0237108100>
- McMahon, C., Baier, A. S., Pascolutti, R., Wegrecki, M., Zheng, S., Ong, J. X., Erlandson, S. C., Hilger, D., Rasmussen, S. G. F., Ring, A. M., Manglik, A., & Kruse, A. C. (2018). Yeast surface display platform for rapid discovery of conformationally selective nanobodies. *Nat. Struct. Mol. Biol.*, 25(3), 289–296. <https://doi.org/10.1038/s41594-018-0028-6>
- Merchant, S. S., Prochnik, S. E., Vallon, O., Harris, E. H., Karpowicz, J., Witman, G. B., Terry, A., Salamov, A., Fritz-laylin, L. K., Maréchal-drouard, L., Marshall, W. F., Qu, L., Nelson, D. R., Sanderfoot, A., Spalding, M. H., Kapitonov, V. V., Ren, Q., Cardol, P., Cerutti, H., ... Grossman, A. R. (2007). The *Chlamydomonas* Genome Reveals the Evolution of Key Animal and Plant Functions. *Science*, 318(5848), 245–250. <https://doi.org/10.1126/science.1143609>
- Molino, J. V. D., de Carvalho, J. C. M., Mayfield, S. P., Carvalho, J. C. M., & Mayfield, S. P. (2018). Comparison of secretory signal peptides for heterologous protein expression in microalgae : Expanding the secretion portfolio for *Chlamydomonas reinhardtii*. *PLoS ONE*, 13(2), 1–20. <https://doi.org/10.1371/journal.pone.0192433>
- Mori, T., Kuroiwa, H., Higashiyama, T., & Kuroiwa, T. (2006). Generative cell specific 1 is essential for angiosperm fertilization. *Nature Cell Biology*, 8(1), 64–71. <https://doi.org/10.1038/ncb1345>
- Nagai, M., Hirano, T., & Shibata, T. (2019). Phototactic Algae-Driven Unidirectional Transport of Submillimeter-Sized Cargo in a Microchannel. *Micromachines*, 10(130), 1–12. <https://doi.org/10.3390/mi10020130>
- Notice to US Food and Drug Administration of the Conclusion that the Intended Use of *Chlamydomonas reinhardtii* (THN 6) Dried Biomass Powder is Generally Recognized as Safe. (2018). GRAS Notice (GRN).
- Okegawa, Y., & Motohashi, K. (2015). A simple and ultra-low cost homemade seamless ligation cloning extract (SLiCE) as an alternative to a commercially available seamless DNA cloning kit. *Biochemistry and Biophysics Reports*, 4, 148–151. <https://doi.org/10.1016/j.bbrep.2015.09.005>
- Padfield, D., Castledine, M., & Buckling, A. (2020). Temperature-dependent changes to host–parasite interactions alter the thermal performance of a bacterial host. In *The ISME Journal* (Vol. 14, Issue 2, pp. 389–398). <https://doi.org/10.1038/s41396-019-0526-5>
- Park, M. (2020). Surface Display Technology for Biosensor Applications : A Review. *Sensors*, 20(2775), 1–17. <https://doi.org/10.3390/s20102775>
- Pepper, L. R., Cho, Y. K., Boder, E. T., & Shusta, E. V. (2008). A decade of yeast surface display technology: Where are we now? *Combinatorial Chemistry & High Throughput*



- Screening, 11(2), 127–134. <https://doi.org/10.2174/138620708783744516>
- Pollock, S. V., Pootakham, W., Shibagaki, N., Moseley, J. L., & Grossman, A. R. (2005). Insights into the acclimation of *Chlamydomonas reinhardtii* to sulfur deprivation. *Photosynthesis Research*, 86(3), 475–489. <https://doi.org/10.1007/s11120-005-4048-9>
- Popescu, C. E., & Lee, R. W. (2007). Mitochondrial genome sequence evolution in *Chlamydomonas*. *Genetics*, 175(2), 819–826. <https://doi.org/10.1534/genetics.106.063156>
- Qiao, Y., Yang, F., Xie, T., Du, Z., Zhong, D., Qi, Y., Li, Y., Li, W., Lu, Z., Rao, J., Sun, Y., & Zhou, M. (2020). Engineered algae : A novel oxygen-generating system for effective treatment of hypoxic cancer. *Science Advances*, 6(21), 1–12. <https://doi.org/http://doi.org/10.1126/sciadv.aba5996>
- Rasala, B. A., Lee, P. A., Shen, Z., Briggs, S. P., Mendez, M., & Mayfield, S. P. (2012). Robust Expression and Secretion of Xylanase 1 in *Chlamydomonas reinhardtii* by fusion to a selection Gene and processing with the FMDV 2A peptide. *PloS One*, 7(8), e43349. <https://doi.org/10.1371/journal.pone.0043349>
- Rasala, B. A., & Mayfield, S. P. (2015). Photosynthetic biomanufacturing in green algae; Production of recombinant proteins for industrial, nutritional, and medical uses. *Photosynthesis Research*, 123(3), 227–239. <https://doi.org/10.1007/s11120-014-9994-7>
- Riehle, M. A., & Jacobs-Lorena, M. (2005). Using bacteria to express and display anti-parasite molecules in mosquitoes: current and future strategies. *Insect Biochem. Mol. Biol.*, 35(7), 699–707. <https://doi.org/10.1016/j.ibmb.2005.02.008>
- Robert A. Bloodgood. (1977). Motility Occurring in Association with the Surface of the *Chlamydomonas Flagellum*. *The Journal of Cell Biology*, 75, 983–989. <https://doi.org/10.1083/jcb.75.3.983>
- Sager, B. R., & Granick, S. (1953). Nutritional Studies With *Chlamydomonas Reinhardi*. *Annals of the New York Academy of Sciences*, 56(5), 831–838. <https://doi.org/http://doi.org/10.1111/j.1749-6632.1953.tb30261.x>
- Saito, F., Suyama, A., Oka, T., Yoko-O, T., Matsuoka, K., Jigami, Y., & Shimma, Y. I. (2014). Identification of novel peptidyl serine alfa-galactosyltransferase gene family in plants. *Journal of Biological Chemistry*, 289(30), 20405–20420. <https://doi.org/10.1074/jbc.M114.553933>
- Salomé, P. A., & Merchant, S. S. (2019). A Series of Fortunate Events : Introducing *Chlamydomonas* as a Reference Organism. *The Plant Cell*, 31(8), 1682–1707. <https://doi.org/10.1105/tpc.18.00952>
- Santomauro, G., Singh, A. V., Park, B., Mohammadrahimi, M., Erkoc, P., Goering, E., Schütz, G., Sitti, M., & Bill, J. (2018). Incorporation of Terbium into a Microalga Leads to Magnetotactic Swimmers. *Advanced Biosystems*, 2(1800039), 1–10. <https://doi.org/10.1002/adbi.201800039>
- Schenck, T. L., Hopfner, U., Chávez, M. N., Machens, H. G., Somlai-Schweiger, I., Giunta, R. E., Bohne, A. V., Nickelsen, J., Allende, M. L., & Egaña, J. T. (2015). Photosynthetic biomaterials: A pathway towards autotrophic tissue engineering. *Acta Biomaterialia*, 15, 39–47. <https://doi.org/10.1016/j.actbio.2014.12.012>
- Schindelin, J., Arganda-Carreras, I., Frise, E., Kaynig, V., Longair, M., Pietzsch, T., Preibisch, S., Rueden, C., Saalfeld, S., Schmid, B., Tinevez, J.-Y., White, D. J., Hartenstein, V., Eliceiri, K., Tomancak, P., & Cardona, A. (2012). Fiji: an open-source platform for biological-image analysis. *Nature Methods*, 9(7), 676–682. <https://doi.org/10.1038/nmeth.2019>
- Schüürmann, J., Quehl, P., Festel, G., & Jose, J. (2014). Bacterial whole-cell biocatalysts by surface display of enzymes: toward industrial application. *Applied Microbiology and Biotechnology*, 98(19), 8031–8046. <https://doi.org/10.1007/s00253-014-5897-y>
- Shaner, N. C., Campbell, R. E., Steinbach, P. a, Giepmans, B. N. G., Palmer, A. E., & Tsien, R. Y. (2004). Improved monomeric red, orange and yellow fluorescent proteins derived from *Discosoma* sp. red fluorescent protein. *Nature Biotechnology*, 22(12), 1567–1572. <https://doi.org/10.1038/nbt1037>
- Shchelikh, I., Sieber, S., & Gademann, K. (2020). Green Algae as a Drug Delivery System for

- the Controlled Release of Antibiotics. *Chemistry – A European Journal*.  
<https://doi.org/10.1002/chem.202003821>
- Silflow, C. D., & Lefebvre, P. A. (2001). Assembly and Motility of Eukaryotic Cilia and Flagella. Lessons from *Chlamydomonas reinhardtii*. *Plant Physiology*, 127(4), 1500–1507. <https://doi.org/10.1104/pp.010807>
- Singh, A. V., Ansari, M. H. D., Laux, P., & Luch, A. (2019). Micro-nanorobots: important considerations when developing novel drug delivery platforms. *Expert Opinion on Drug Delivery*, 16(11), 1259–1275. <https://doi.org/10.1080/17425247.2019.1676228>
- Siripornadulsil, S., Dabrowski, K., & Sayre, R. (2007). Microalgal Vaccines. In R. León, A. Galván, & E. Fernández (Eds.), *Transgenic Microalgae as Green Cell Factories* (pp. 122–128). Springer New York. [https://doi.org/10.1007/978-0-387-75532-8\\_11](https://doi.org/10.1007/978-0-387-75532-8_11)
- Smith, M. R., Khera, E., & Wen, F. (2015). Engineering novel and improved biocatalysts by cell surface display. *Industrial and Engineering Chemistry Research*, 54(16), 4021–4032. <https://doi.org/10.1021/ie504071f>
- Sproles, A. E., Fields, F. J., Smalley, T. N., Le, C. H., Badary, A., & Mayfield, S. P. (2021). Recent advancements in the genetic engineering of microalgae. *Algal Research*, 53(December 2020), 102158. <https://doi.org/10.1016/j.algal.2020.102158>
- Stickney, Z., Losacco, J., McDevitt, S., Zhang, Z., & Lu, B. (2016). Development of exosome surface display technology in living human cells. *Biochem. Biophys. Res. Commun.*, 472(1), 53–59. <https://doi.org/10.1016/j.bbrc.2016.02.058>
- Szponarski, M., Schwizer, F., Ward, T. R., & Gademann, K. (2018). On-cell catalysis by surface engineering of live cells with an artificial metalloenzyme. *Communications Chemistry*, 19(5), 439–443. <https://doi.org/10.1038/s42004-018-0087-y>
- Tabuchi, S., Ito, J., & Adachi, T. (2010). Display of both N- and C-terminal target fusion proteins on the *Aspergillus oryzae* cell surface using a chitin-binding module. *Applied Microbiology and Biotechnology*, 87(5), 1783–1789. <https://doi.org/10.1007/s00253-010-2664-6>
- Tanaka, T., Yamada, R., Ogino, C., & Kondo, A. (2012). Recent developments in yeast cell surface display toward extended applications in biotechnology. *Applied Microbiology and Biotechnology*, 95(3), 577–591. <https://doi.org/10.1007/s00253-012-4175-0>
- Tinevez, J., Perry, N., Schindelin, J., Hoopes, G. M., Reynolds, G. D., Laplantine, E., Bednarek, S. Y., Shorte, S. L., & Eliceiri, K. W. (2017). TrackMate : An open and extensible platform for single-particle tracking. *Methods*, 115, 80–90. <https://doi.org/10.1016/j.ymeth.2016.09.016>
- Tran, M., Van, C., Barrera, D. J., Pettersson, P. L., Peinado, C. D., Bui, J., & Mayfield, S. P. (2013). Production of unique immunotoxin cancer therapeutics in algal chloroplasts. *Proc. Natl. Acad. Sci. U. S. A.*, 110(1), E15–22. <https://doi.org/10.1073/pnas.1214638110>
- Tran, M., Zhou, B., Pettersson, P. L., Gonzalez, M. J., & Mayfield, S. P. (2009). Synthesis and assembly of a full-length human monoclonal antibody in algal chloroplasts. *Biotechnology and Bioengineering*, 104(4), 663–673. <https://doi.org/10.1002/bit.22446>
- Valansi, C., Moi, D., Leikina, E., Matveev, E., Graña, M., Chernomordik, L. V., Romero, H., Aguilar, P. S., & Podbilewicz, B. (2017). Arabidopsis HAP2 / GCS1 is a gamete fusion protein homologous to somatic and viral fusogens. *The Journal of Cell Biology*, 216(3), 1–11. <https://doi.org/http://doi.org/10.1083/jcb.201610093>
- Voigt, J. (2003). 14-3-3 Proteins Are Constituents of the Insoluble Glycoprotein Framework of the *Chlamydomonas* Cell Wall. *The Plant Cell Online*, 15(>6), 1399–1413. <https://doi.org/10.1105/tpc.010611>
- Wachter, R. M., Yarbrough, D., Kallio, K., & Remington, S. J. (2000). Crystallographic and Energetic Analysis of Binding of Selected Anions to the Yellow Variants of Green Fluorescent Protein. *Journal of Molecular Biology*, 301(1), 157–171. <https://doi.org/10.1006/jmbi.2000.3905>
- Wang, Z., Mathias, A., Stavrou, S., & Neville, D. M. (2005). A new yeast display vector permitting free scFv amino termini can augment ligand binding affinities. *Protein Engineering, Design and Selection*, 18(7), 337–343.

- <https://doi.org/10.1093/protein/gzi036>
- Watanabe, T., & Flavin, M. (1976). Nucleotide-metabolizing Enzymes in Chlamydomonas Flagella. *Journal of Biological Chemistry*, 251(1), 182–192.  
[https://doi.org/10.1016/S0021-9258\(17\)33943-1](https://doi.org/10.1016/S0021-9258(17)33943-1)
- Weibel, D. B., Garstecki, P., Ryan, D., DiLuzio, W. R., Mayer, M., Seto, J. E., & Whitesides, G. M. (2005). Microoxen: Microorganisms to move microscale loads. *Proceedings of the National Academy of Sciences*, 102(34), 11963–11967.  
<https://doi.org/10.1073/pnas.0505481102>
- Wilken, L. R., & Nikolov, Z. L. (2012). Recovery and purification of plant-made recombinant proteins. *Biotechnology Advances*, 30(2), 419–433.  
<https://doi.org/10.1016/j.biotechadv.2011.07.020>
- Wu, C. H., Mulchandani, A., & Chen, W. (2008). Versatile microbial surface-display for environmental remediation and biofuels production. *Trends in Microbiology*, 16(4), 181–188. <https://doi.org/10.1016/j.tim.2008.01.003>
- Xu, X., Gao, C., Zhang, X., Che, B., Ma, C., Qiu, J., Tao, F., & Xu, P. (2011). Production of N-Acetyl-D Neuraminic Acid by Use of an Efficient Spore Surface Display System. *Applied and Environmental Microbiology*, 77(10), 3197–3201.  
<https://doi.org/10.1128/AEM.00151-11>
- Yasa, O., Erkoc, P., Alapan, Y., & Sitti, M. (2018). Microalga-Powered Microswimmers toward Active Cargo Delivery. *Advanced Materials*, 30(45), 1–10.  
<https://doi.org/10.1002/adma.201804130>
- Yin, L., Guo, X., Liu, L., Zhang, Y., & Feng, Y. (2018). Self-Assembled Multimeric-Enzyme Nanoreactor for Robust and Efficient Biocatalysis. In *ACS Biomaterials Science & Engineering* 4(6), 2095–2099. <https://doi.org/10.1021/acsbmaterials.8b00279>
- Yuzbasheva, E. Y., Yuzbashev, T. V., Perkovskaya, N. I., Mostova, E. B., Vybornaya, T. V., Sukhozhenko, A. V., Toropygin, I. Y., & Sineoky, S. P. (2015). Cell Surface Display of Yarrowia lipolytica Lipase Lip2p Using the Cell Wall Protein YIPir1p, Its Characterization, and Application as a Whole-Cell Biocatalyst. *Applied Biochemistry and Biotechnology*, 175(8), 3888–3900. <https://doi.org/10.1007/s12010-015-1557-7>
- Zhang, G., Johnston, T., Quin, M. B., & Schmidt-Dannert, C. (2019). Developing a Protein Scaffolding System for Rapid Enzyme Immobilization and Optimization of Enzyme Functions for Biocatalysis. *ACS Synth. Biol.*, 8(8), 1867–1876.  
<https://doi.org/10.1021/acssynbio.9b00187>
- Zhang, Y., Werling, U., & Edelmann, W. (2012). SLiCE: a novel bacterial cell extract-based {DNA} cloning method. *Nucleic Acids Res.*, 40(8), e55.

Supplementary File 1 – Full microscope system description (10.5281/zenodo.4739722).

Supplementary File 2 – Additional raw microscopy images of constructs (10.5281/zenodo.4739722).
